# Supplementary material for: Biological Properties of New Chiral 2-Methyl-5,6,7,8-tetrahydroquinolin-8-amine-based Compounds
Source: MDPI journal article supplement (doi:10.3390/molecules25235561), 2020-11-27
Supplement: s1 [file s1]

## SUPPORTING INFORMATION

### **Biological properties of new chiral 2-methyl-5,6,7,8-tetrahydroquinolin-8-amine based compounds**

Giorgio Facchetti,<sup>a\*</sup> Michael S. Christodoulou,<sup>a</sup> Lina Barragán Mendoza,<sup>b,c</sup> Federico Cusinato,<sup>b</sup> Lisa Dalla Via,<sup>b\*</sup> Isabella Rimoldi<sup>a</sup>

<sup>a</sup> *DISFARM, Sezione di Chimica Generale e Organica "A. Marchesini" Università degli Studi di Milano via Venezian, 21, 20133, Milano, Italy*

<sup>b</sup> *Dipartimento di Scienze del Farmaco, Università degli Studi di Padova, via F. Marzolo, 5, 35131, Padova, Italy*

<sup>c</sup> *Facultad de Ciencias Químicas, Universidad de Colima, Carr. Colima-Coquimatlán km 9, Coquimatlán, Colima, 28400, México*

## INDEX

|                                                                                   |    |
|-----------------------------------------------------------------------------------|----|
| Chiral purity of 2-methyl-5,6,7,8-tetrahydroquinolin-8-amine.....                 | S1 |
| Additional pharmacological experiments.....                                       | S2 |
| $^1\text{H}$ and $^{13}\text{C}$ -NMR spectra and $\text{Log}P$ of compounds..... | S4 |

**Figure 1S1:** Source of chirality: 2-methyl-5,6,7,8-tetrahydroquinolin-8-amine. The enantiomeric excess by HPLC was evaluated after Boc protection step. Chiral column: Phenomenex Lux Cellulose-4; eluent hexane/isopropanol=90/10;  $\lambda=254$  nm; flow=1.0 mL/min.

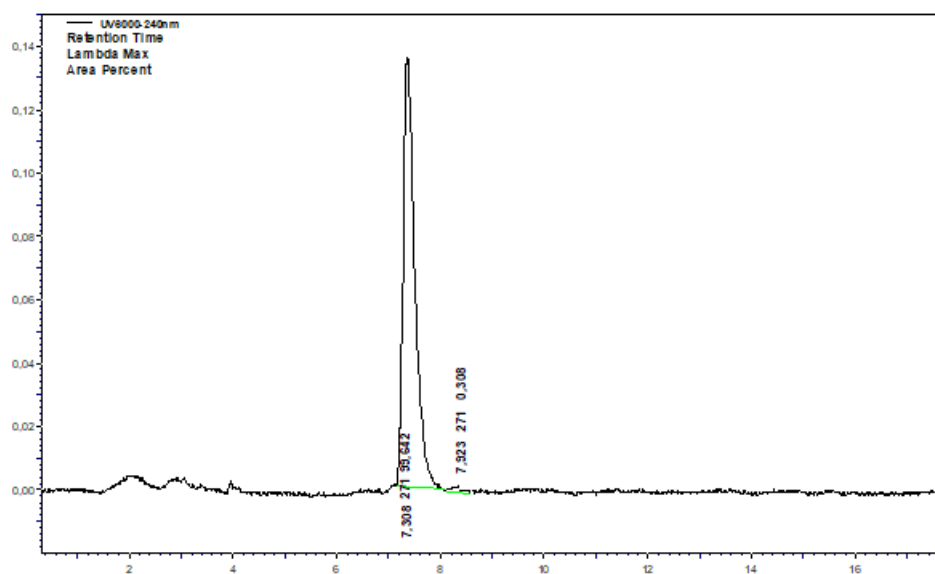

Retention time *R*-enantiomer: 7.3 min; 99.3 % e.e.

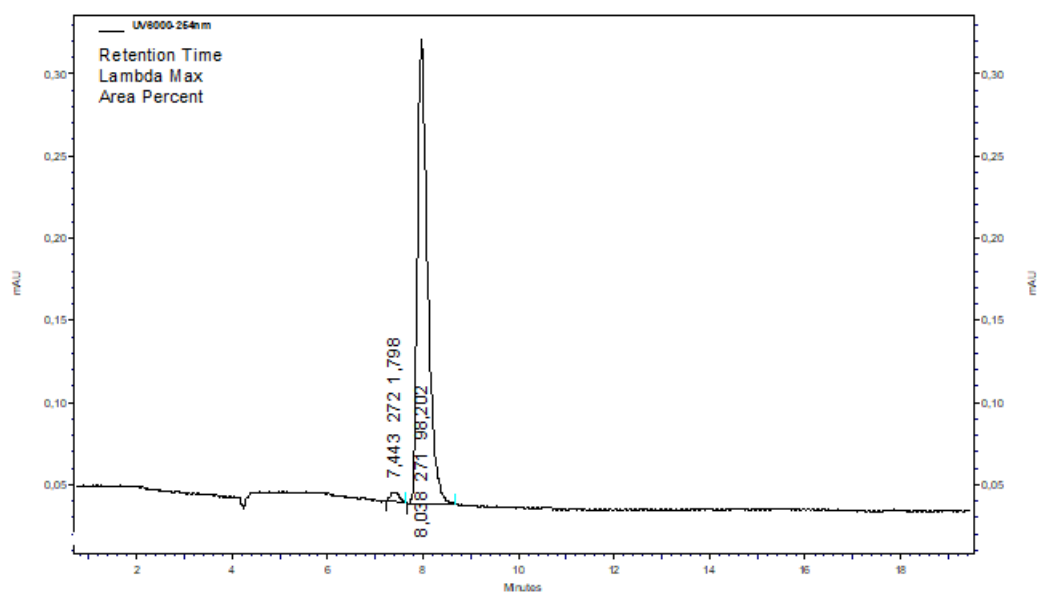

Retention time *S*-enantiomer: 8.0 min; 96.4 % e.e.

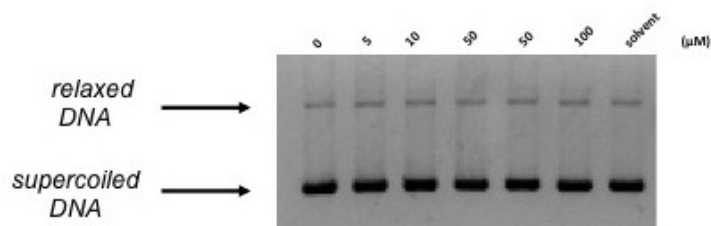

**Figure 2SI.** Effect of compound **(R)-5a** on the electrophoretic mobility of supercoiled DNA. Supercoiled plasmid pBR322 DNA was incubated in the absence or in the presence of **(R)-5a** at indicated concentrations. The effect of solvent alone on DNA was also assayed (solvent).

### Unwinding assay

Supercoiled pBR322 plasmid DNA (0.15 µg, Fermentas Life Sciences) was incubated in TAE buffer (0.04 M Tris, 0.02 M Acetic Acid, EDTA 1 mM, pH=8) with test compound at indicated concentrations for 3 h at 37 °C in 10 µL final volume. 3 µL of loading buffer (0.125% bromophenol blue, 0.125% xylene cyanol and 50% glycerol) was added to each sample and DNA was separated by electrophoresis on a 0.8% agarose gel at room temperature. The gels were stained with ethidium bromide (1 µg/mL) in TAE buffer, transilluminated by UV light, and the fluorescence emission was visualized by a CCD camera coupled to a Bio-Rad Gel Doc XR apparatus.

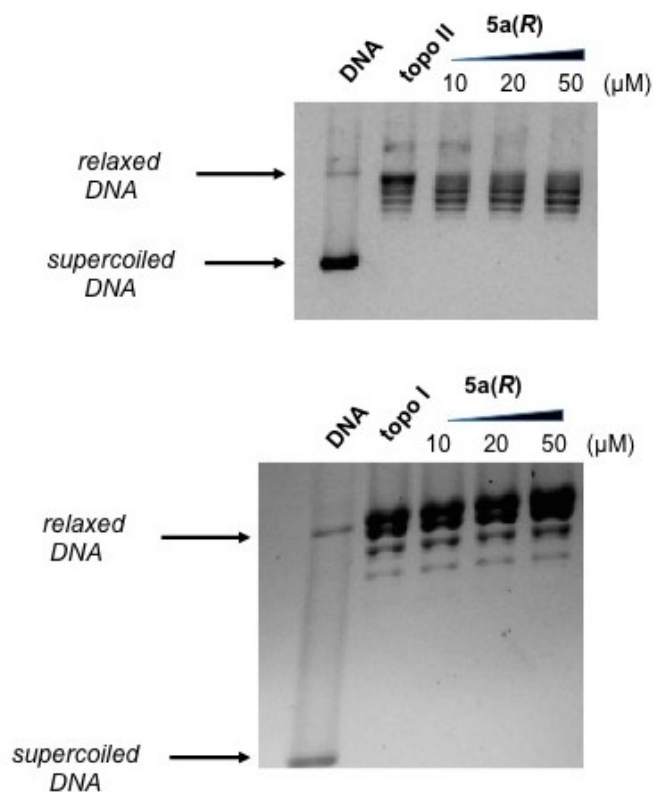

**Figure 3SI.** Effect of compound **(R)-5a** on the relaxation of supercoiled pBR322 DNA by human recombinant topoisomerase I or II. Supercoiled plasmid pBR322 DNA (DNA) was incubated with topo I (topo I) or II in the absence (topo II) and in the presence of **(R)-5a** at indicated concentrations.

### Topoisomerase I and II relaxation assay

Supercoiled pBR322 plasmid DNA (20 ng, Fermentas Life Sciences) and 5U topoisomerase I (human topoisomerase I, TopoGEN) or alternatively, supercoiled pBR322 plasmid DNA (0.25 μg) and 1U topoisomerase II (human topoisomerase II alpha, Inspiralis) were incubated in the presence of test compound as indicated for 60 min at 37 °C in 20 μL reaction buffer. Reactions were stopped by adding 4 μL stop buffer (5% sodium dodecyl sulfate, 0.125% bromophenol blue, and 30% glycerol), 50 μg/mL proteinase K (Sigma) and incubating for a further 30 min at 37 °C. The samples were separated by electrophoresis on a 1% agarose gel at room temperature. The gels were stained with ethidium bromide 1 μg/mL in TAE buffer (0.04 M Tris-acetate and 0.001 M EDTA), transilluminated by UV light, and fluorescence emission was visualized by a CCD camera coupled to a Bio-Rad Gel Doc XR apparatus.

<sup>1</sup>H- NMR in CDCl<sub>3</sub> (300 MHz) of (E)-2-methyl-6-(((2-methyl-5,6,7,8-tetrahydroquinolin-8-yl)imino)methyl)phenol **1a**

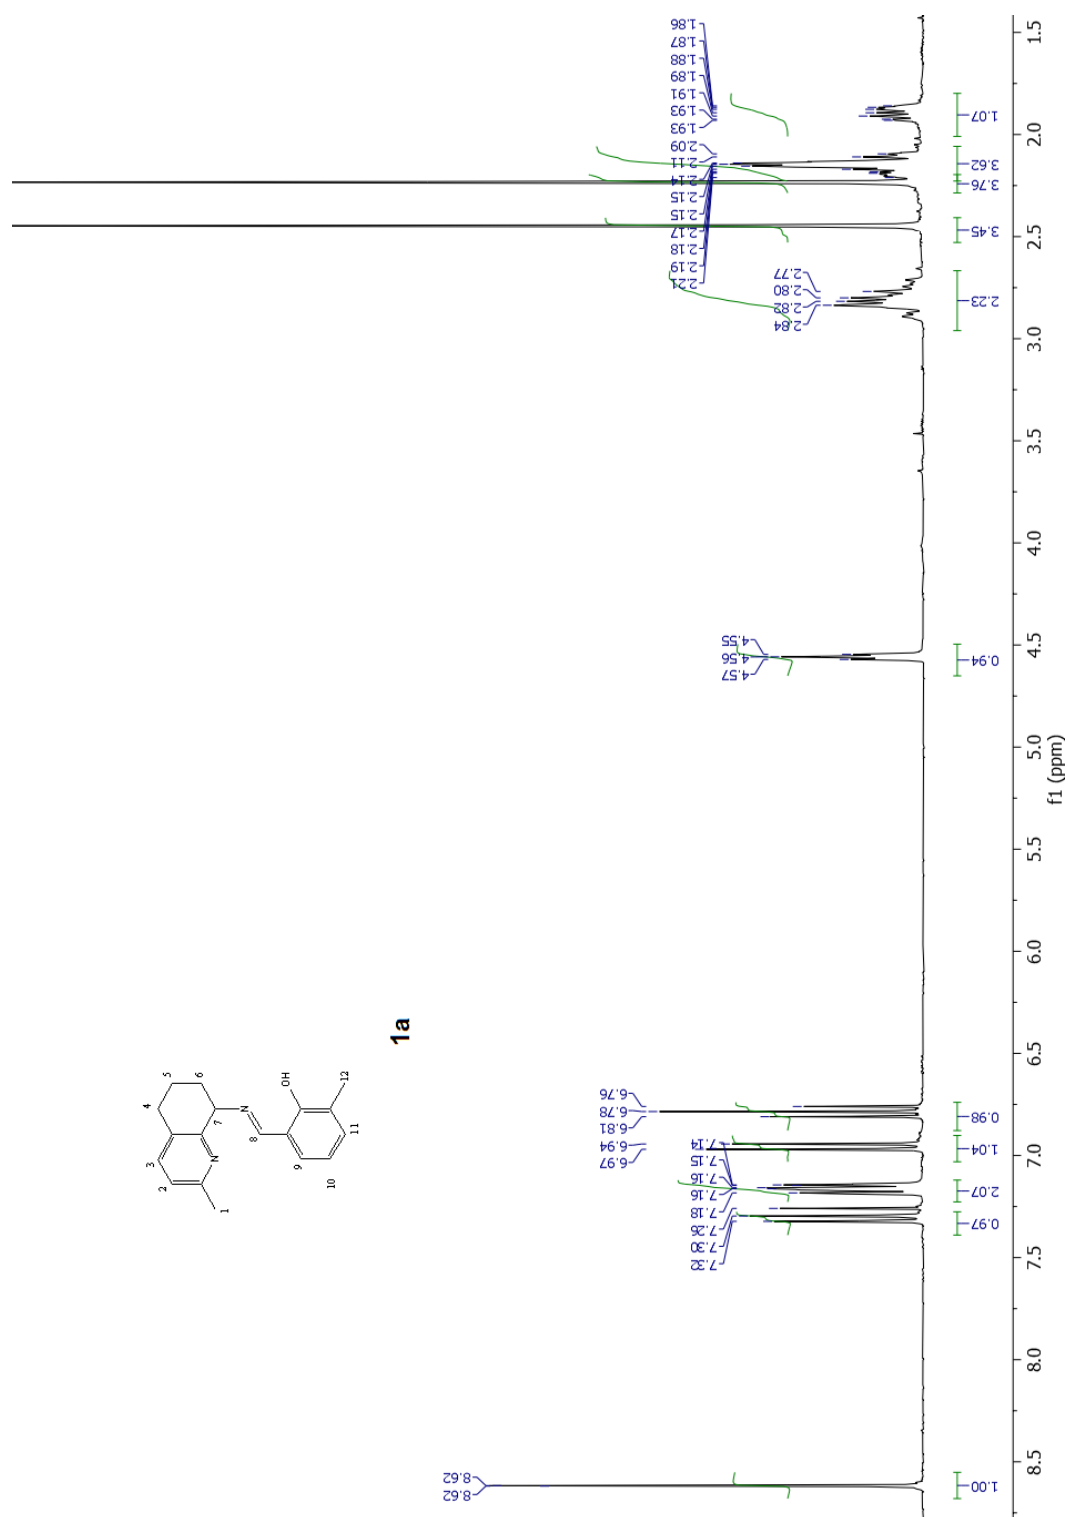

<sup>13</sup>C- NMR in CDCl<sub>3</sub> (75 MHz) of (E)-2-methyl-6-(((2-methyl-5,6,7,8-tetrahydroquinolin-8-yl)imino)methyl)phenol **1a**

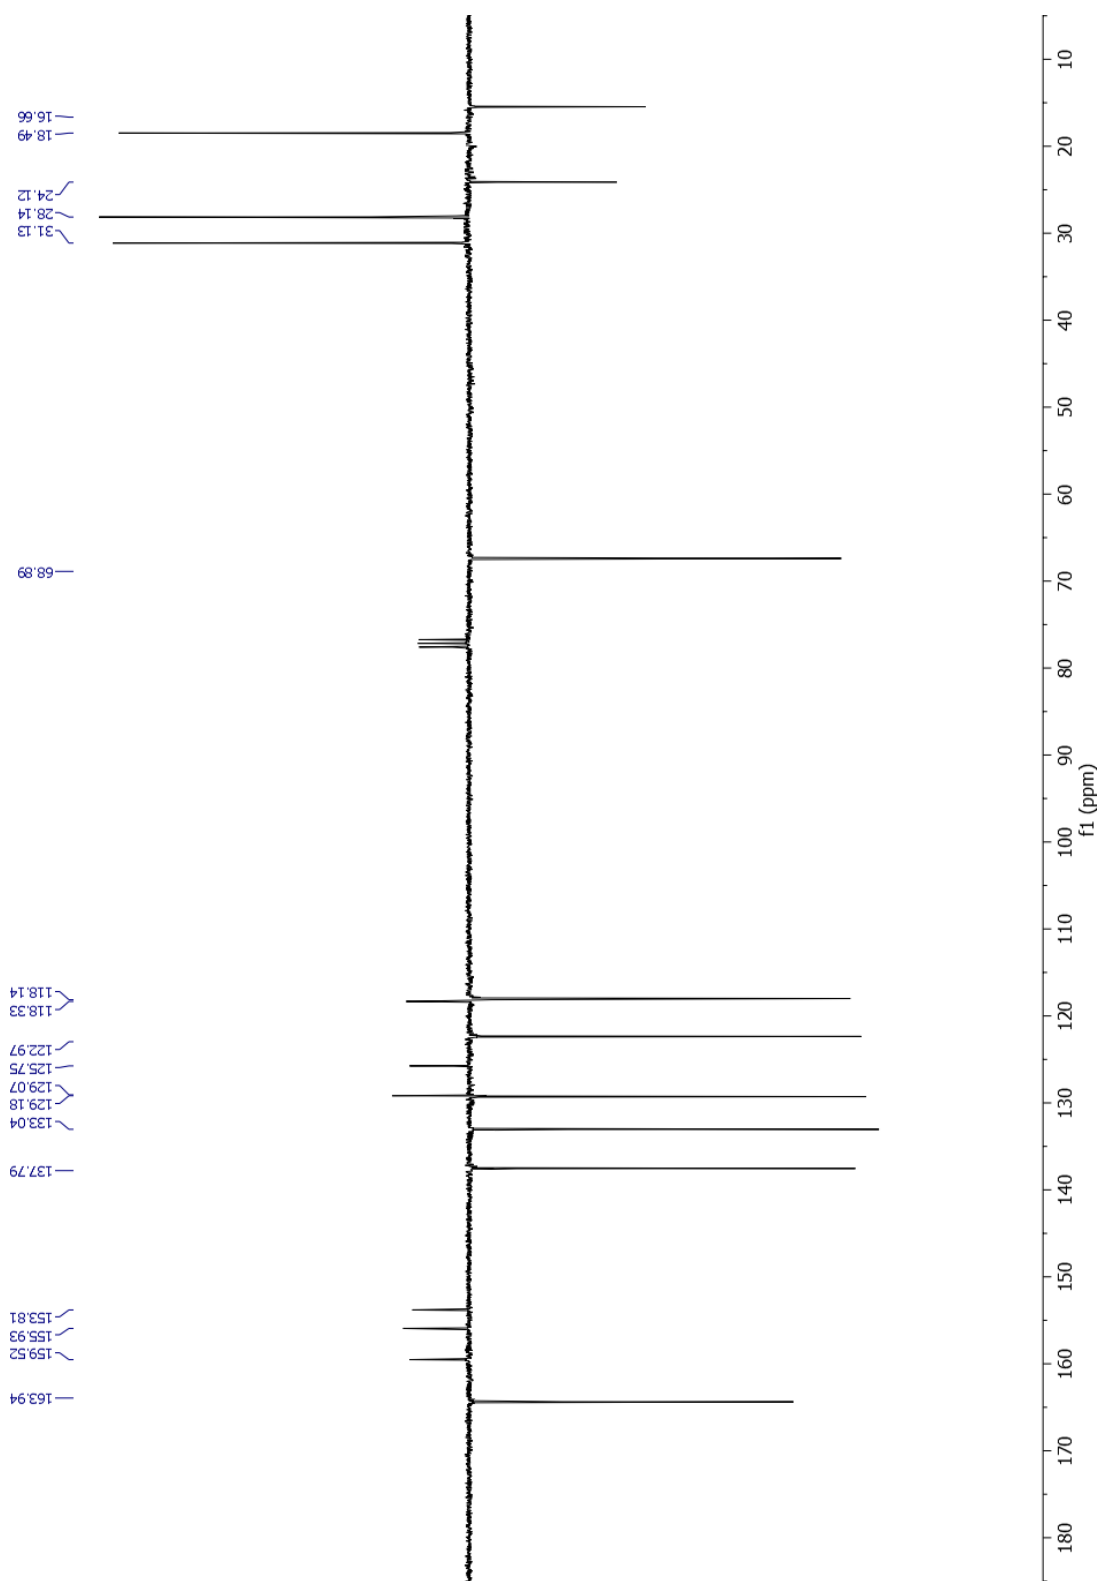

Log  $P$  of (E)-2-methyl-6-(((2-methyl-5,6,7,8-tetrahydroquinolin-8-yl)imino)methyl)phenol **1a**

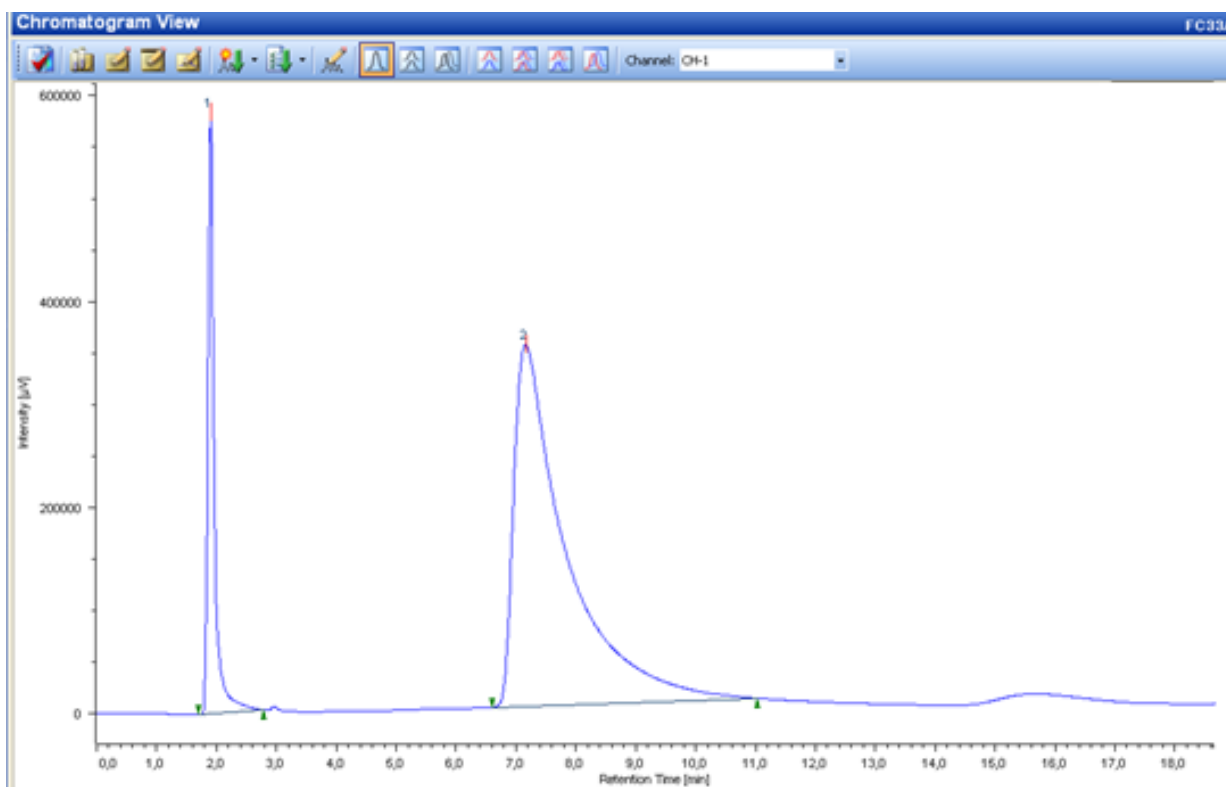

| Peak Name | CH | tR    | Area     | Height  | Area%  | Height% | Quantity | NTP  | Resolution | Symmetry Factor |
|-----------|----|-------|----------|---------|--------|---------|----------|------|------------|-----------------|
| Unknown   | 1  | 1,900 | 4251631  | 2581000 | 16,619 | 62,414  | N/A      | 2259 | 7,126      | 1,604           |
| Unknown   | 1  | 7,168 | 21330704 | 360415  | 83,301 | 37,606  | N/A      | 471  | N/A        | 3,716           |

$$\text{Log } P_{o/w} = 3.73$$



<sup>1</sup>H-NMR in CDCl<sub>3</sub> (300 MHz) of (*E*)-4-methyl-2-(((2-methyl-5,6,7,8-tetrahydroquinolin-8-yl)imino)methyl)phenol **2a**

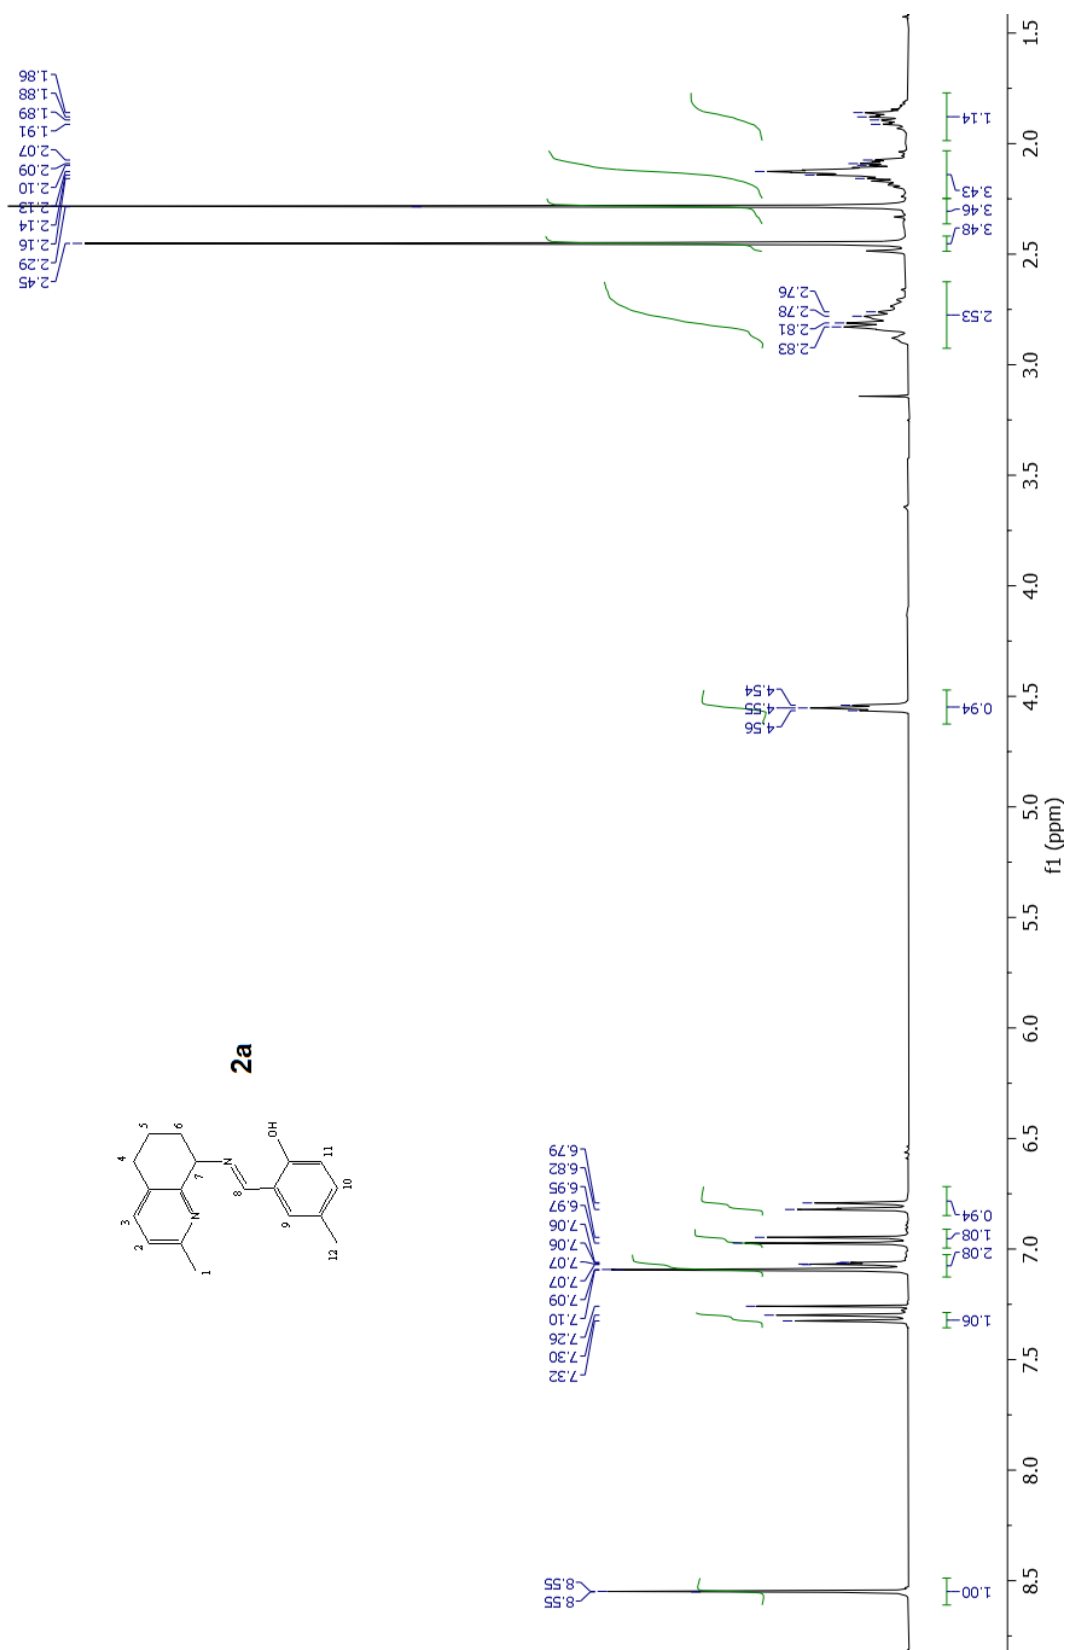

$^{13}\text{C}$ -NMR in  $\text{CDCl}_3$  (75 MHz) of (*E*)-4-methyl-2-(((2-methyl-5,6,7,8-tetrahydroquinolin-8-yl)imino)methyl)phenol **2a**

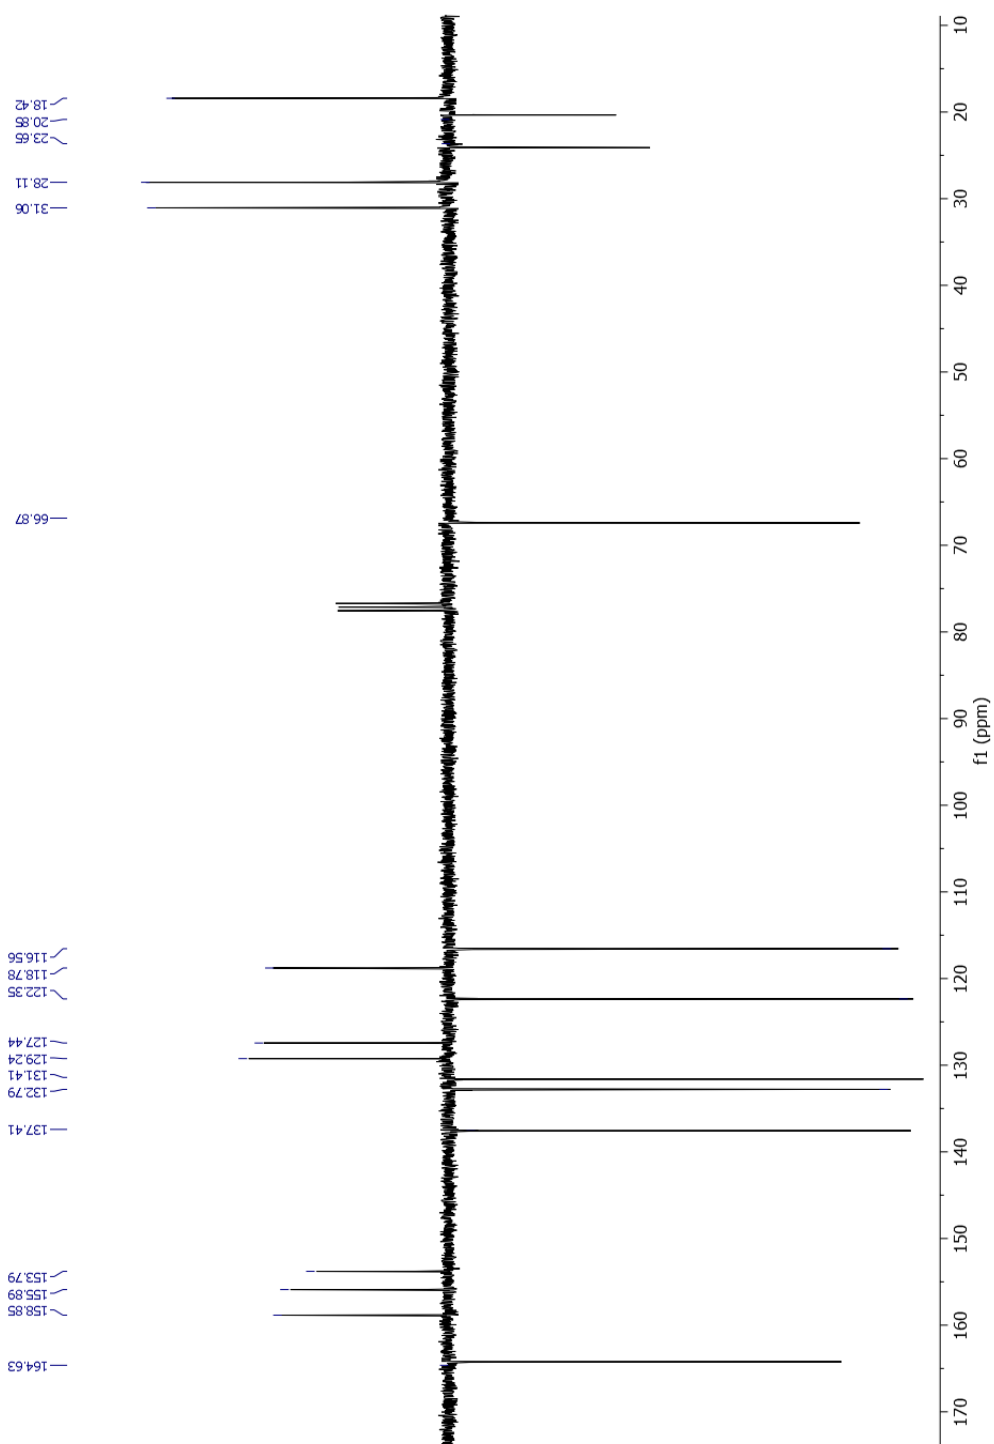

Log  $P$  of (*E*)-4-methyl-2-(((2-methyl-5,6,7,8-tetrahydroquinolin-8-yl)imino)methyl)phenol **2a**

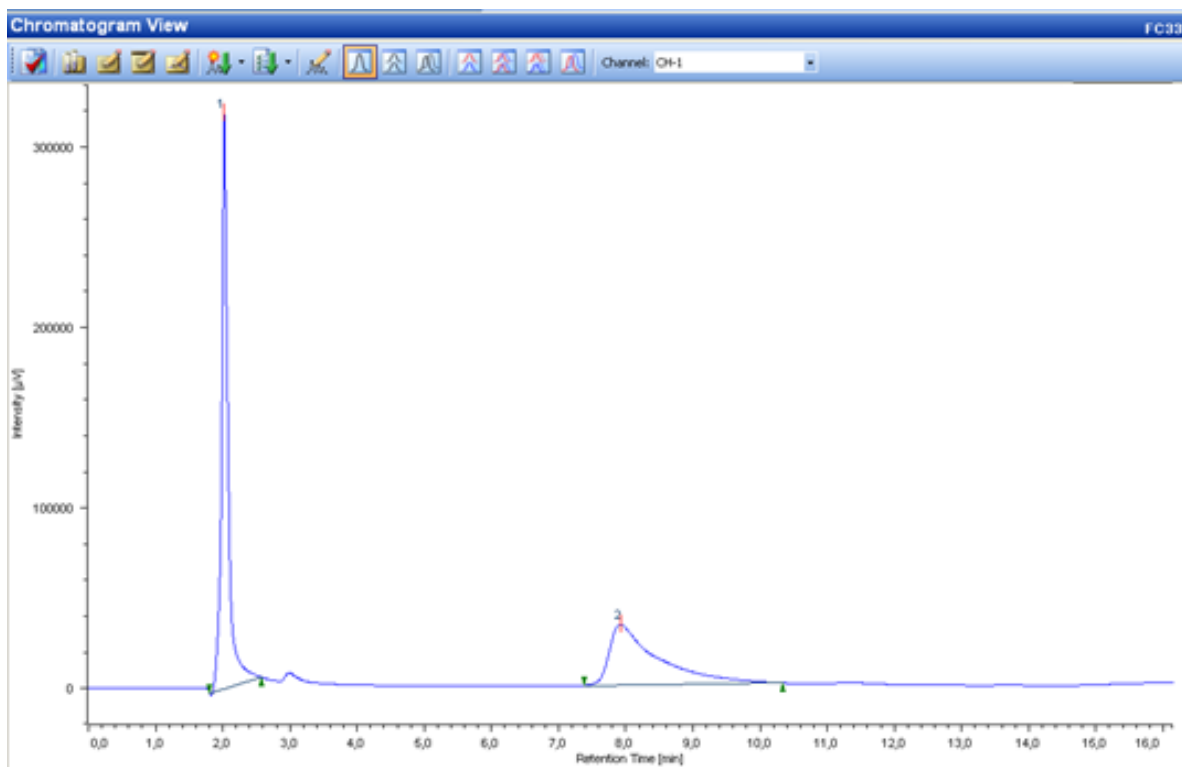

| Peak Name | CH | tR    | Area    | Height | Area%  | Height% | Quantity | NTP  | Resolution | Symmetry Factor |
|-----------|----|-------|---------|--------|--------|---------|----------|------|------------|-----------------|
| Unknown   | 1  | 2,017 | 2130436 | 310411 | 66,923 | 90,457  | N/A      | 3290 | 9,778      | 1,324           |
| Unknown   | 1  | 7,917 | 1679124 | 33691  | 44,077 | 9,543   | N/A      | 876  | N/A        | 3,058           |

Log  $P_{o/w} = 3.81$

$^1\text{H-NMR}$  in  $\text{CDCl}_3$  (300 MHz) of (*E*)-*N*-(2-methyl-5,6,7,8-tetrahydroquinolin-8-yl)-1-(pyridin-2-yl)methanimine **3a**

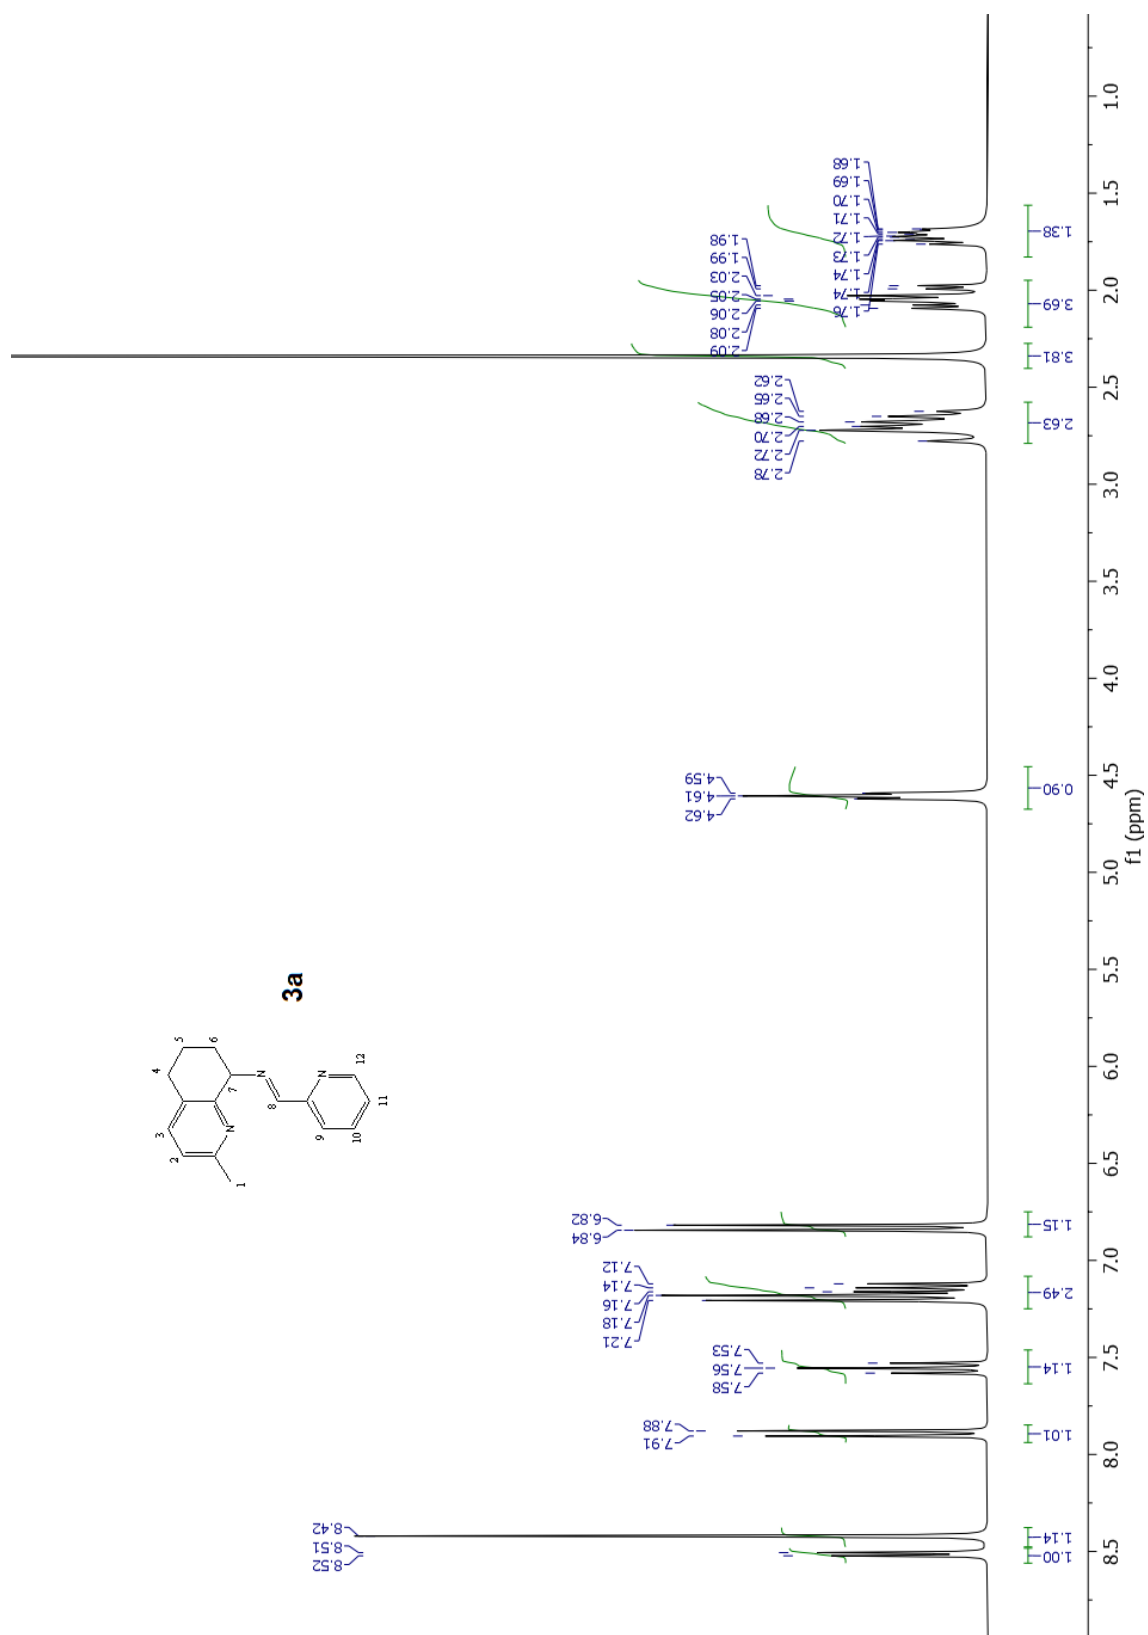

$^{13}\text{C}$ -NMR in  $\text{CDCl}_3$  (75 MHz) of (*E*)-*N*-(2-methyl-5,6,7,8-tetrahydroquinolin-8-yl)-1-(pyridin-2-yl)methanimine **3a**

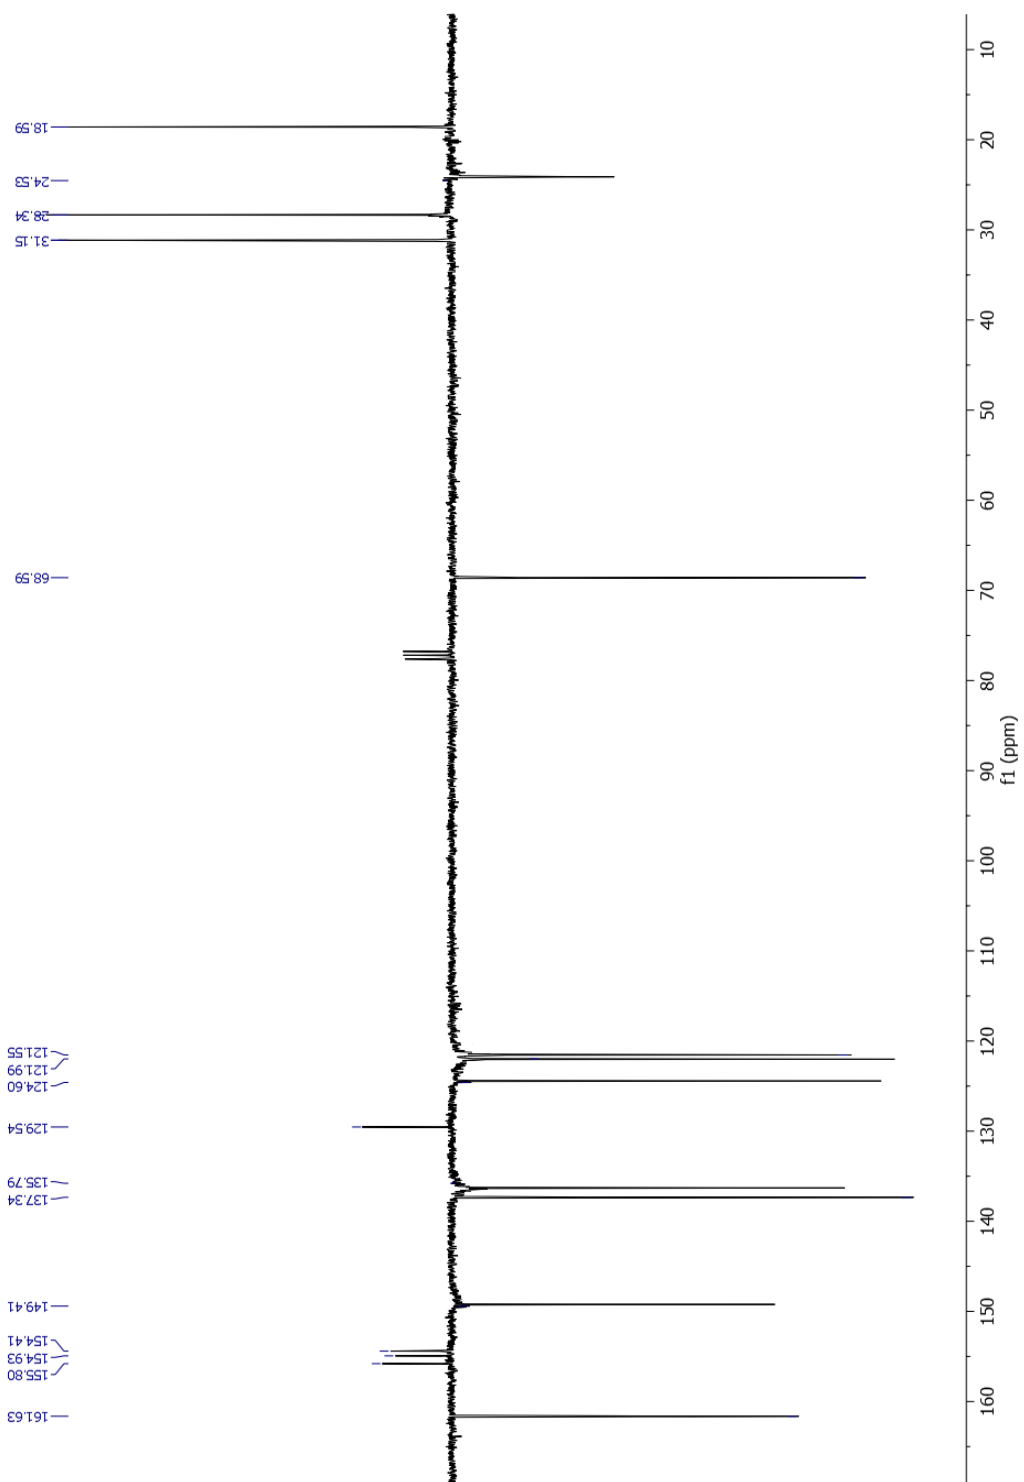

Log  $P$  of (*E*)-*N*-(2-methyl-5,6,7,8-tetrahydroquinolin-8-yl)-1-(pyridin-2-yl)methanimine **3a**

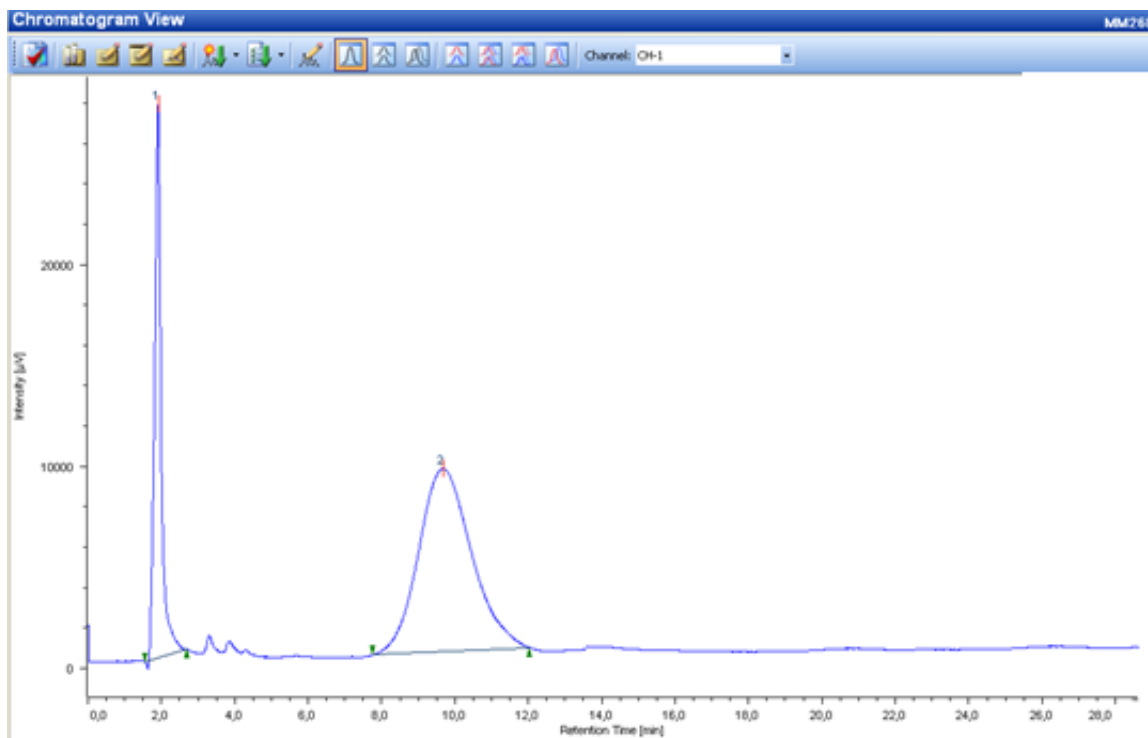

| Peak Name | CH | tR    | Area   | Height | Area%  | Height% | Quantity | NTP | Resolution | Symmetry Factor |
|-----------|----|-------|--------|--------|--------|---------|----------|-----|------------|-----------------|
| Unknown   | 1  | 1,917 | 337959 | 27343  | 27,139 | 75,135  | N/A      | 763 | 9,839      | 1,207           |
| Unknown   | 1  | 9,985 | 907335 | 9049   | 72,861 | 24,865  | N/A      | 608 | N/A        | 1,151           |

Log  $P_{o/w}$  = 4.07

$^1\text{H-NMR}$  in  $\text{CDCl}_3$  (300 MHz) of (*E*)-1-(1-methyl-1H-imidazol-4-yl)-N-(2-methyl-5,6,7,8-tetrahydroquinolin-8-yl)methanimine **4a**

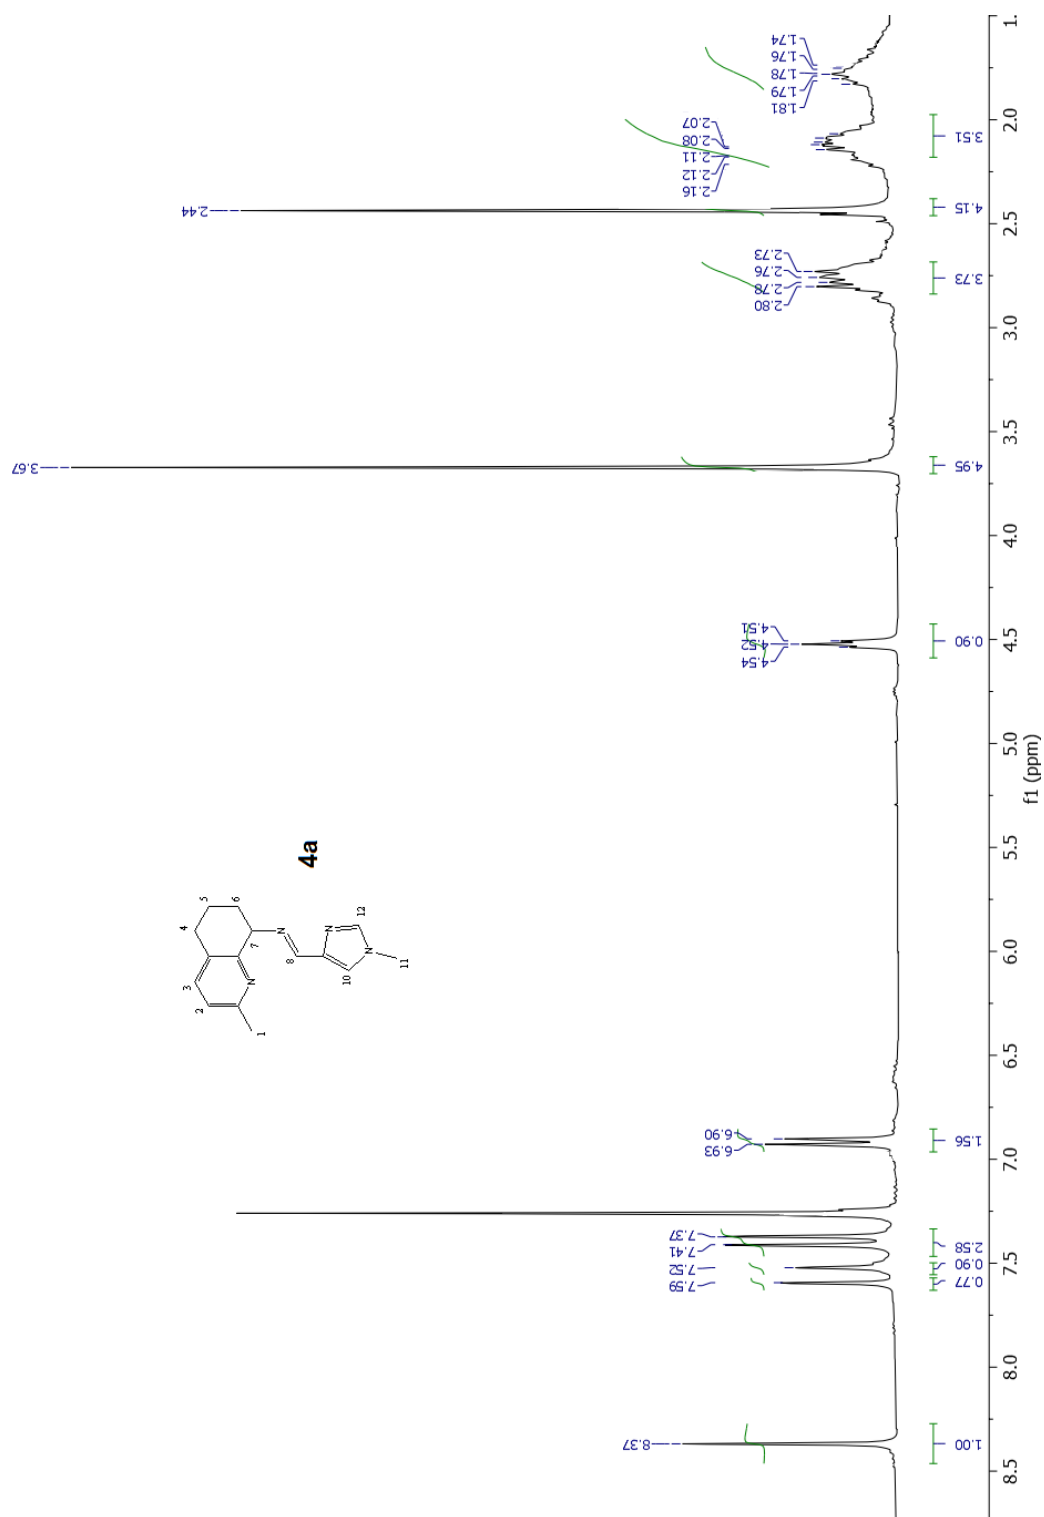

$^{13}\text{C}$ -NMR in  $\text{CDCl}_3$  (75 MHz) of (*E*)-1-(1-methyl-1H-imidazol-4-yl)-N-(2-methyl-5,6,7,8-tetrahydroquinolin-8-yl)methanimine **4a**

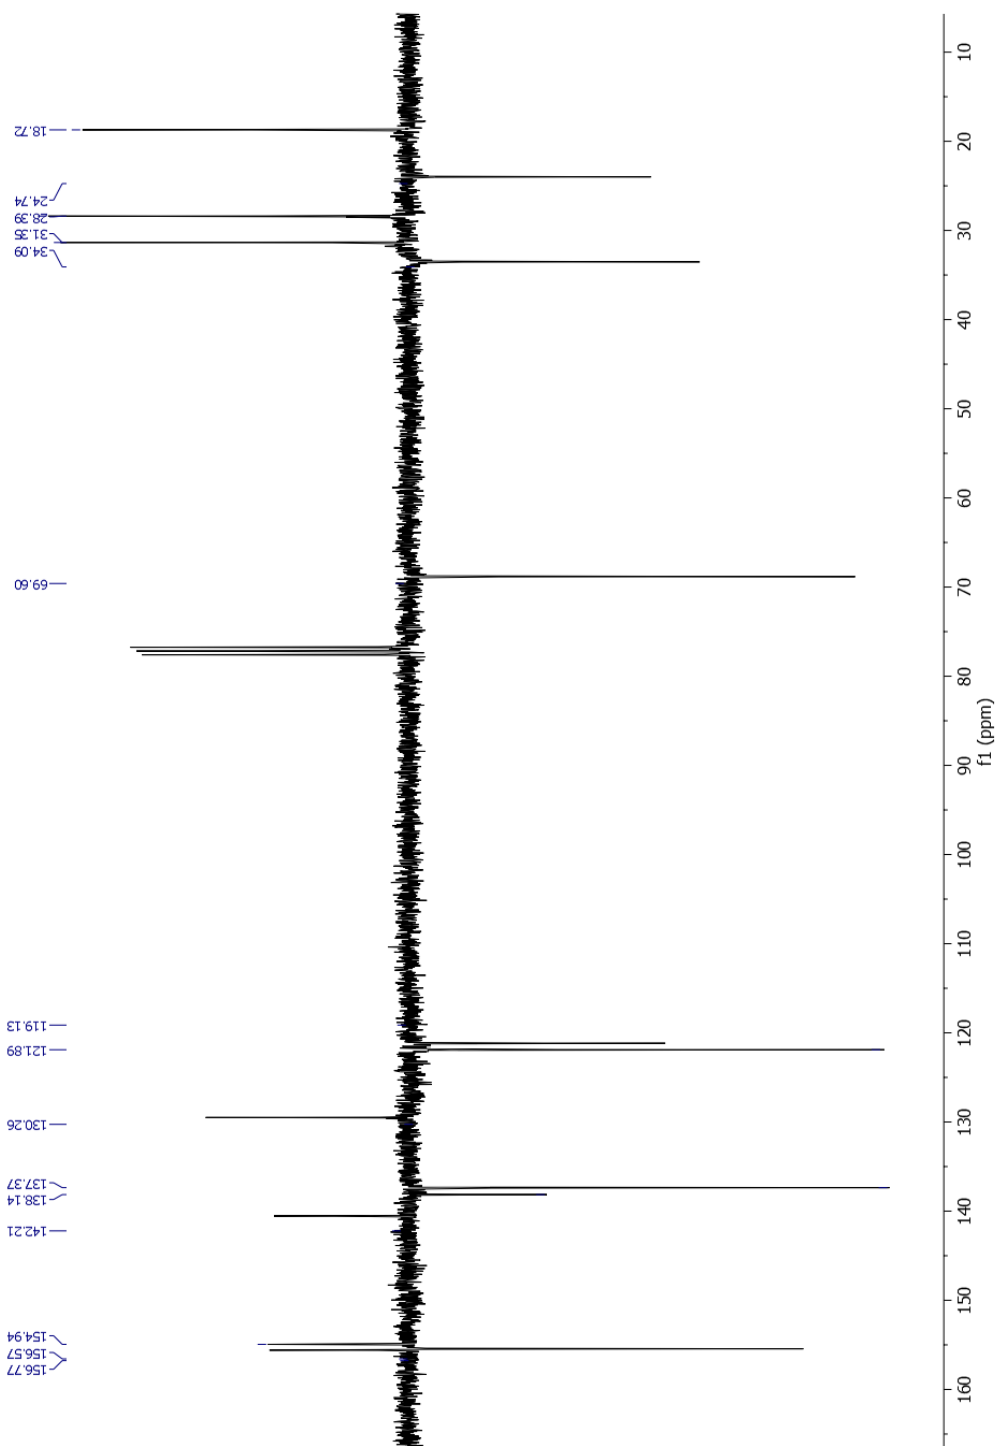



Log *P* of (*E*)-1-(1-methyl-1H-imidazol-4-yl)-N-(2-methyl-5,6,7,8-tetrahydroquinolin-8-yl)methanimine **4a**

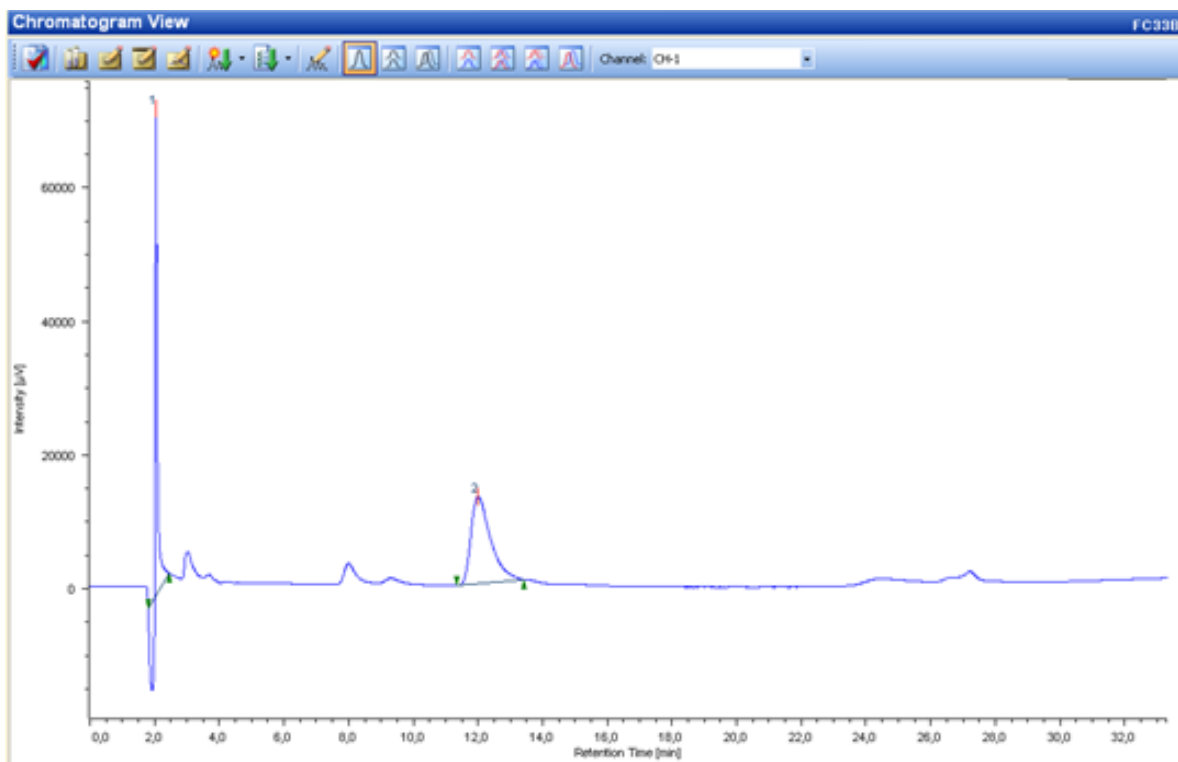

| Peak Name | CH | tR     | Area   | Height | Area%  | Height% | Quantity | NTP  | Resolution | Symmetry Factor |
|-----------|----|--------|--------|--------|--------|---------|----------|------|------------|-----------------|
| Unknown   | 1  | 2,042  | 336400 | 72577  | 37,762 | 64,704  | N/A      | 6623 | 16,962     | 2,545           |
| Unknown   | 1  | 11,992 | 664430 | 13025  | 62,238 | 15,216  | N/A      | 1907 | N/A        | 1,741           |

Log  $P_{o/w}$  = 3.94

$^1\text{H-NMR}$  in  $\text{CDCl}_3$  (300 MHz) of (*E*)-1-(1H-imidazol-2-yl)-N-(2-methyl-5,6,7,8-tetrahydroquinolin-8-yl)methanimine **5a**

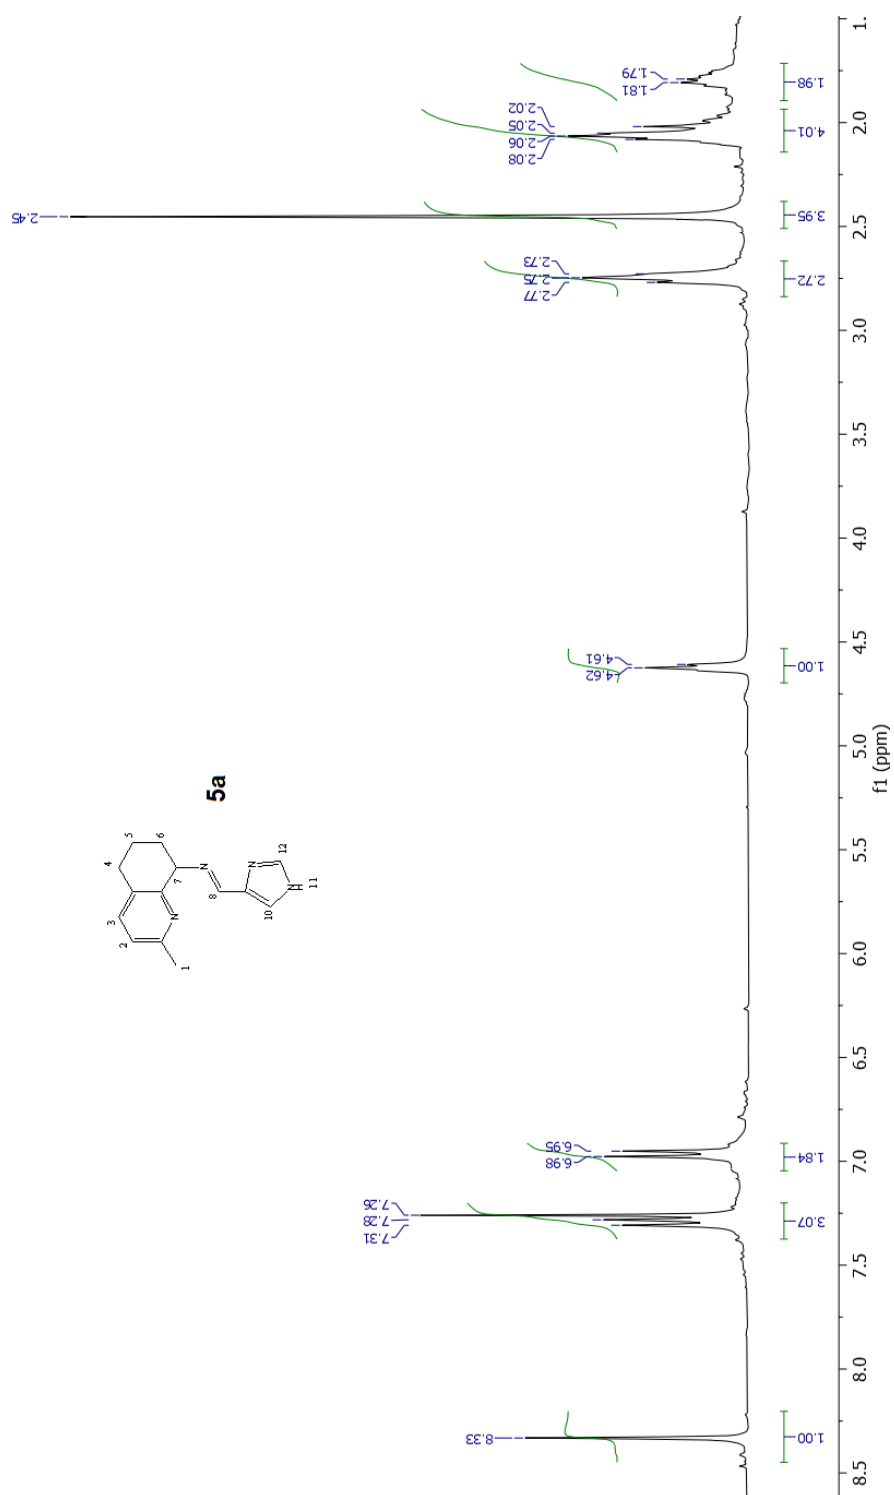

$^{13}\text{C}$ -NMR in  $\text{CDCl}_3$  (75 MHz) of (*E*)-1-(1H-imidazol-2-yl)-N-(2-methyl-5,6,7,8-tetrahydroquinolin-8-yl)methanimine **5a**

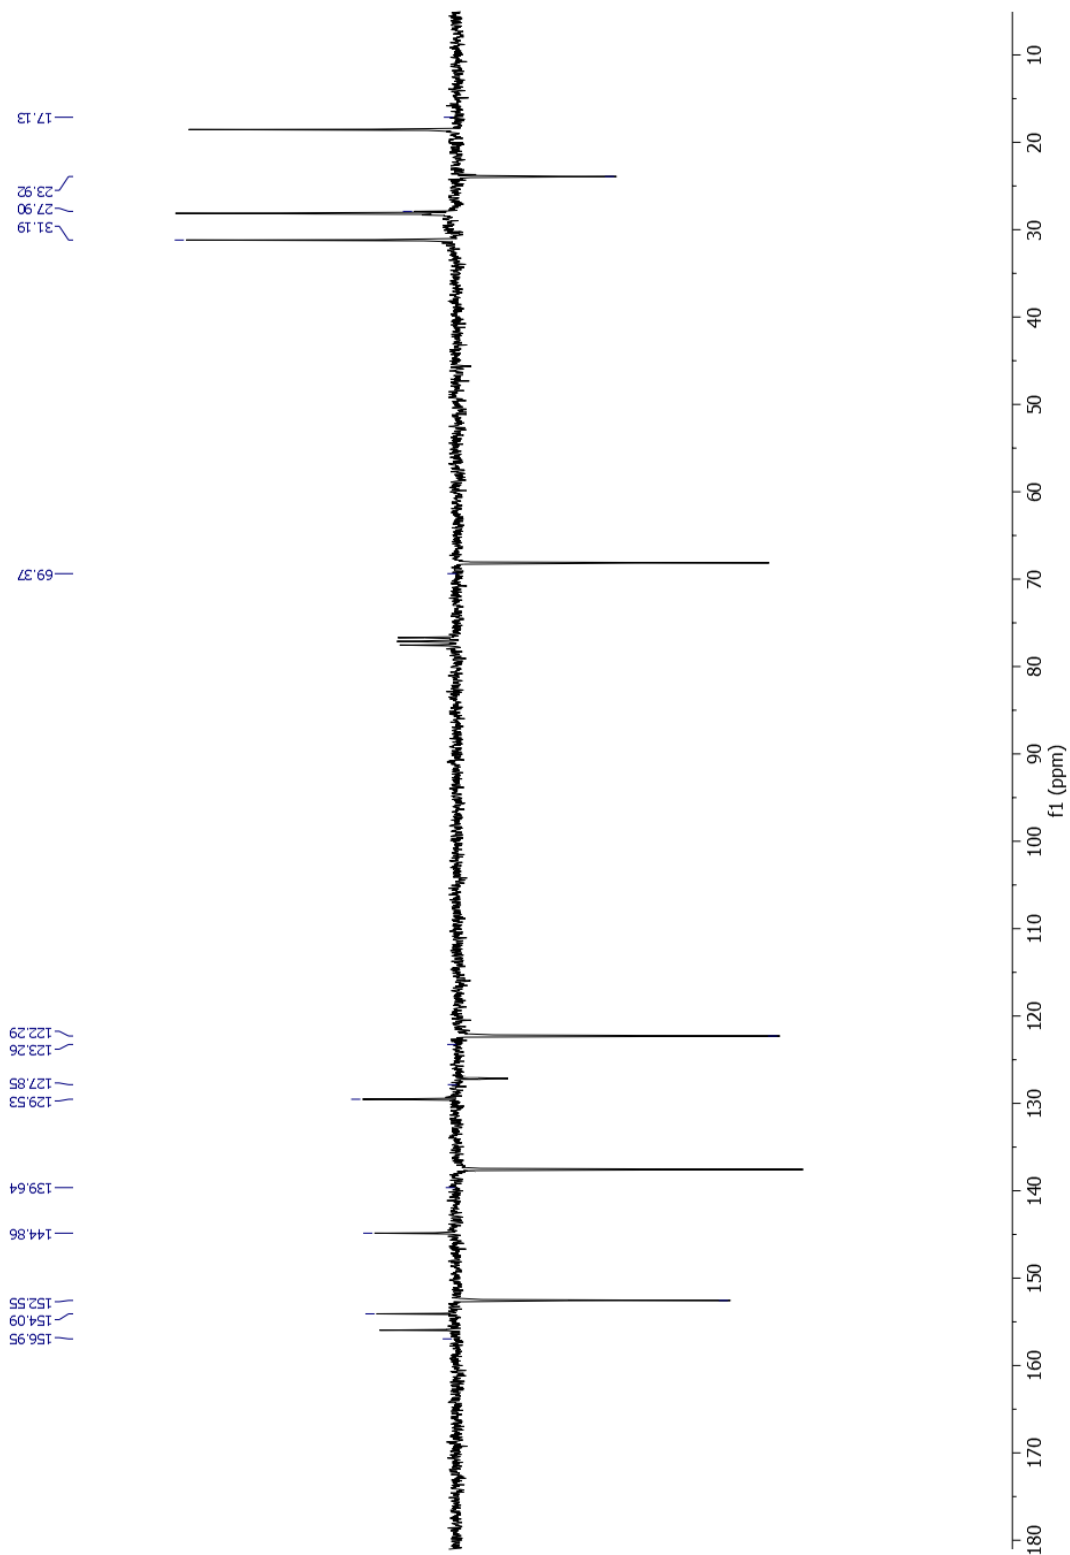

Log  $P$  of (*E*)-1-(1H-imidazol-2-yl)-N-(2-methyl-5,6,7,8-tetrahydroquinolin-8-yl)methanimine **5a**

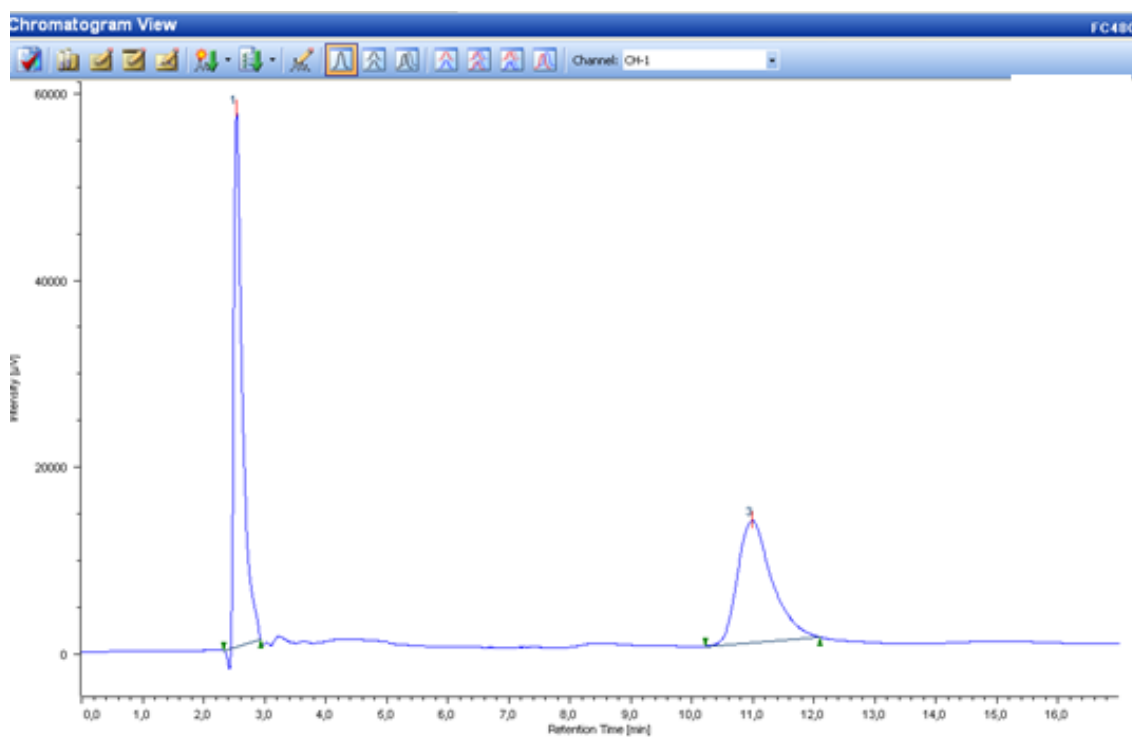

| Peak Name | CH | tR     | Area   | Height | Area%  | Height% | Quantity | NTP  | Resolution | Symmetry Factor |
|-----------|----|--------|--------|--------|--------|---------|----------|------|------------|-----------------|
| Unknown   | 1  | 2,542  | 512946 | 67412  | 49,967 | 63,154  | N/A      | 1906 | 6,515      | 2,268           |
| Unknown   | 1  | 10,975 | 550006 | 13044  | 50,033 | 14,349  | N/A      | 1968 | N/A        | 1,419           |

Log  $P_{o/w}$  = 4.30

<sup>1</sup>H-NMR in CDCl<sub>3</sub> (300 MHz) of (*E*)-9-(((2-methyl-5,6,7,8-tetrahydroquinolin-8-yl)imino)methyl)-2,3,6,7-tetrahydro-1H,5H-pyrido [3,2,1-ij]quinolin-8-ol **6a**

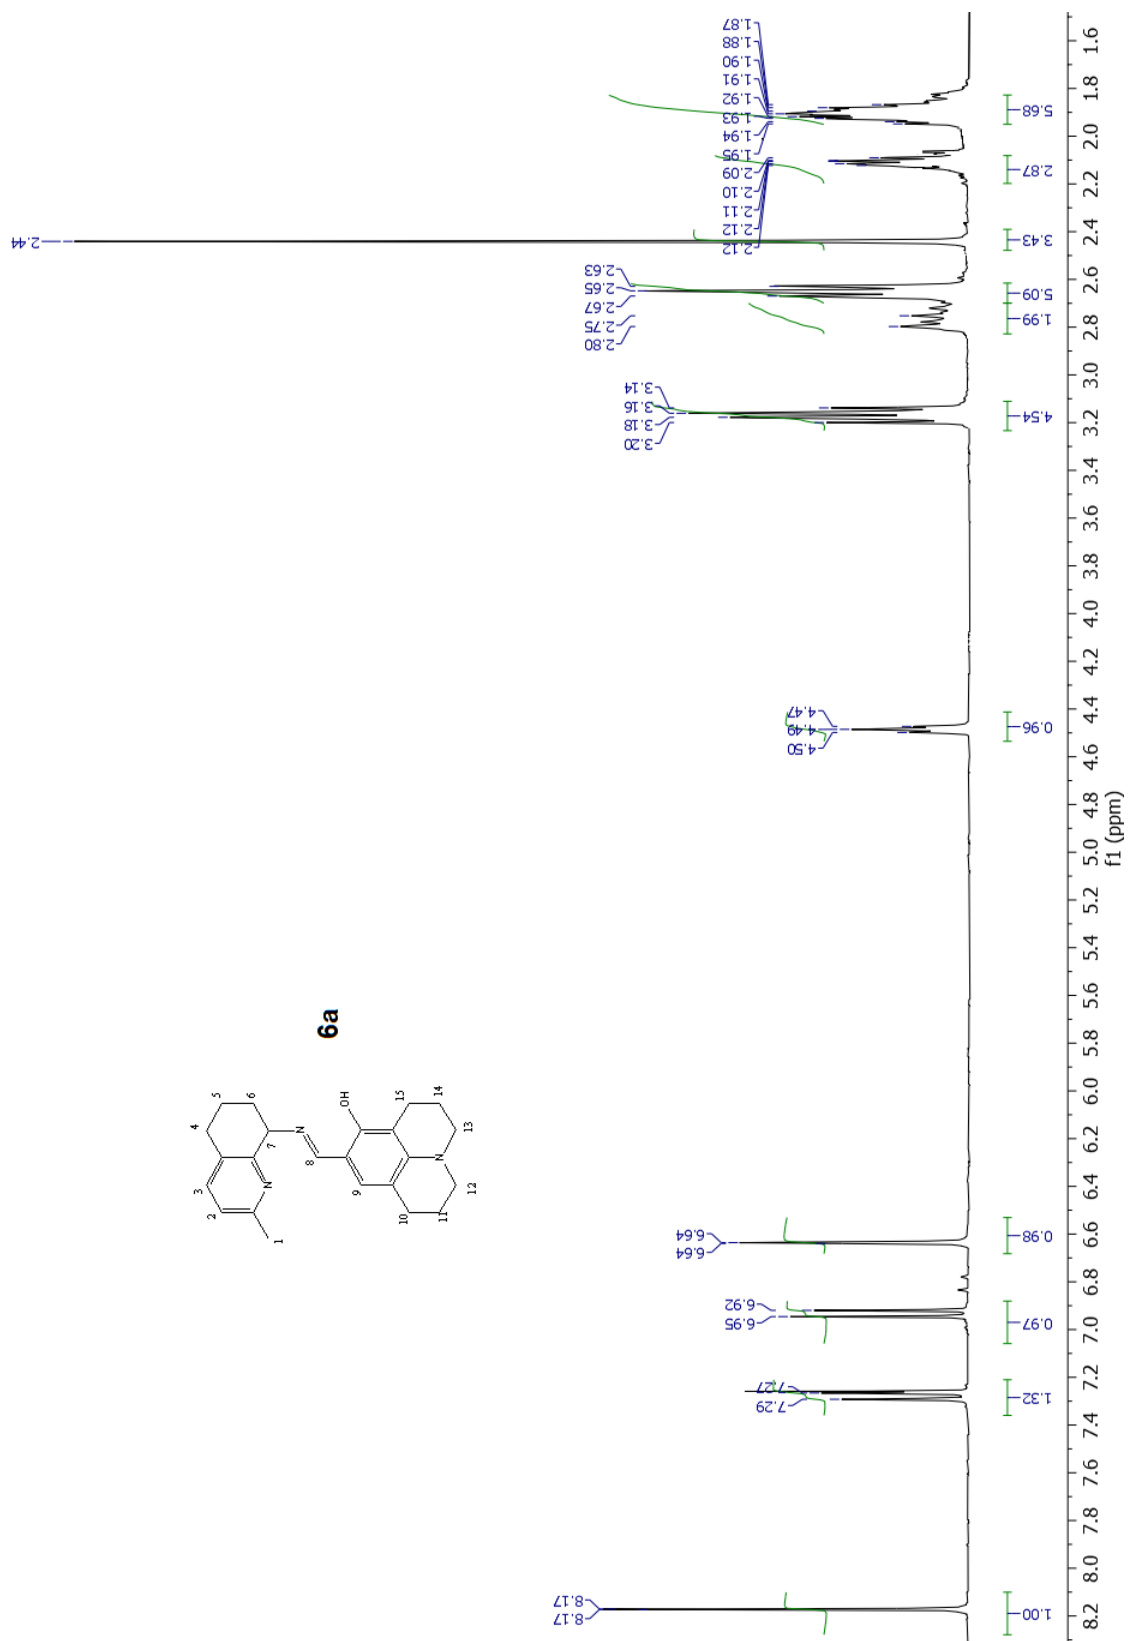

<sup>13</sup>C-NMR in CDCl<sub>3</sub> (75 MHz) of (*E*)-9-(((2-methyl-5,6,7,8-tetrahydroquinolin-8-yl)imino)methyl)-2,3,6,7-tetrahydro-1*H*,5*H*-pyrido [3,2,1-*ij*]quinolin-8-ol **6a**

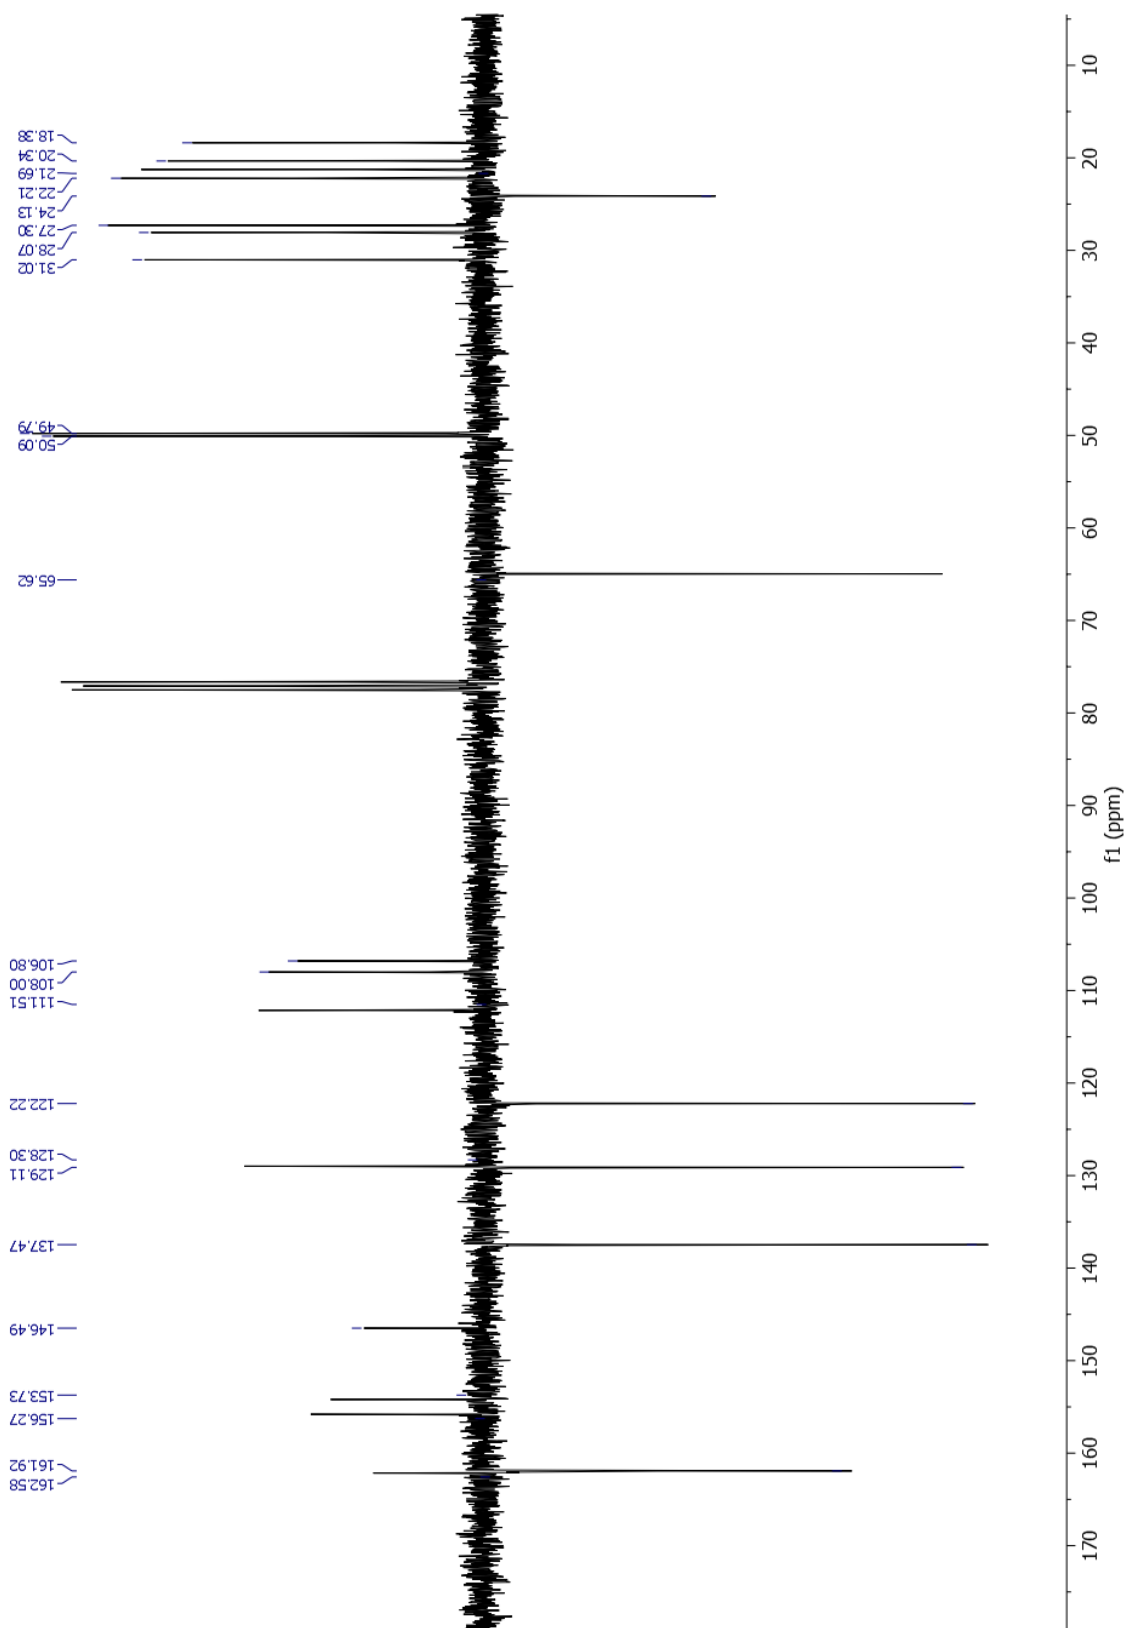

Log  $P$  of (*E*)-9-(((2-methyl-5,6,7,8-tetrahydroquinolin-8-yl)imino)methyl)-2,3,6,7-tetrahydro-1*H*,5*H*-pyrido [3,2,1-*ij*]quinolin-8-ol **6a**

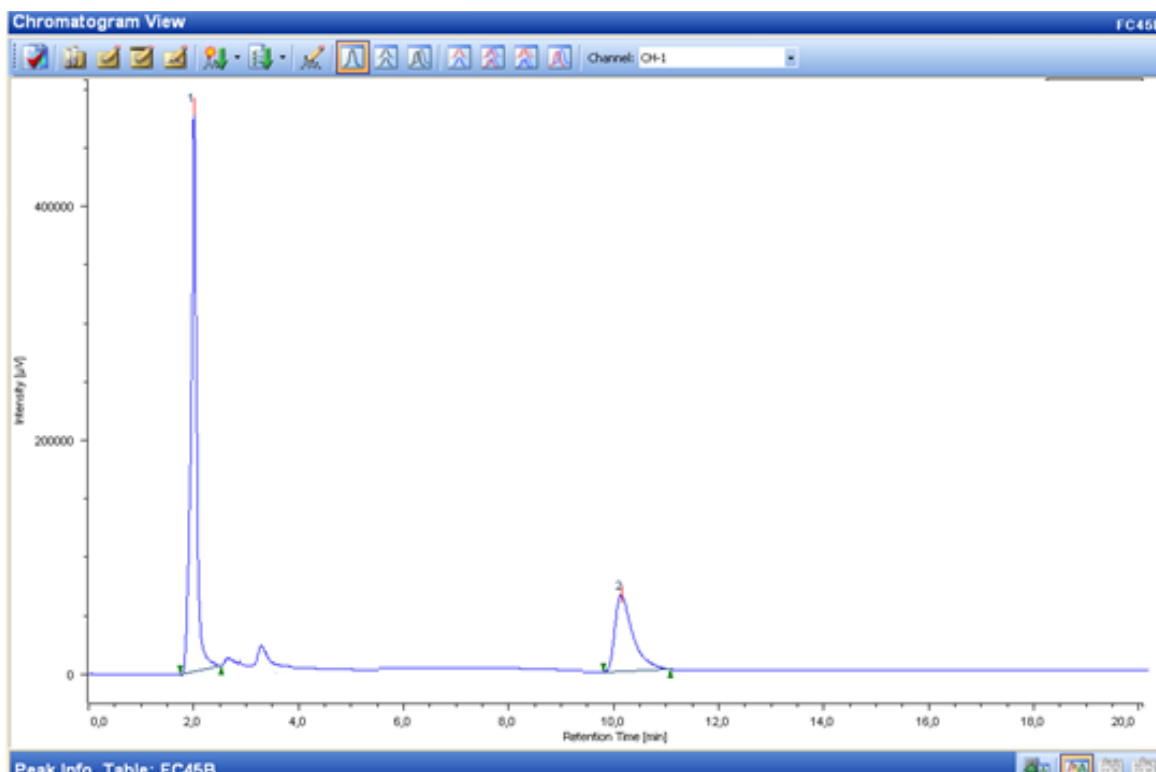

| Peak Name | CH | tR     | Area   | Height | Area%  | Height% | Quantity | NTP  | Resolution | Symmetry Factor |
|-----------|----|--------|--------|--------|--------|---------|----------|------|------------|-----------------|
| Unknown   | 1  | 2,030  | 537444 | 36293  | 47,225 | 55,874  | N/A      | 1530 | 5,442      | 1,848           |
| Unknown   | 1  | 10,238 | 407785 | 11254  | 52,775 | 36,125  | N/A      | 1326 | N/A        | 1,730           |

Log  $P_{o/w}$  = 4.09

<sup>1</sup>H-NMR in CDCl<sub>3</sub> (300 MHz) of 2-methyl-6-(((2-methyl-5,6,7,8-tetrahydroquinolin-8-yl)amino)methyl)phenol **1b**

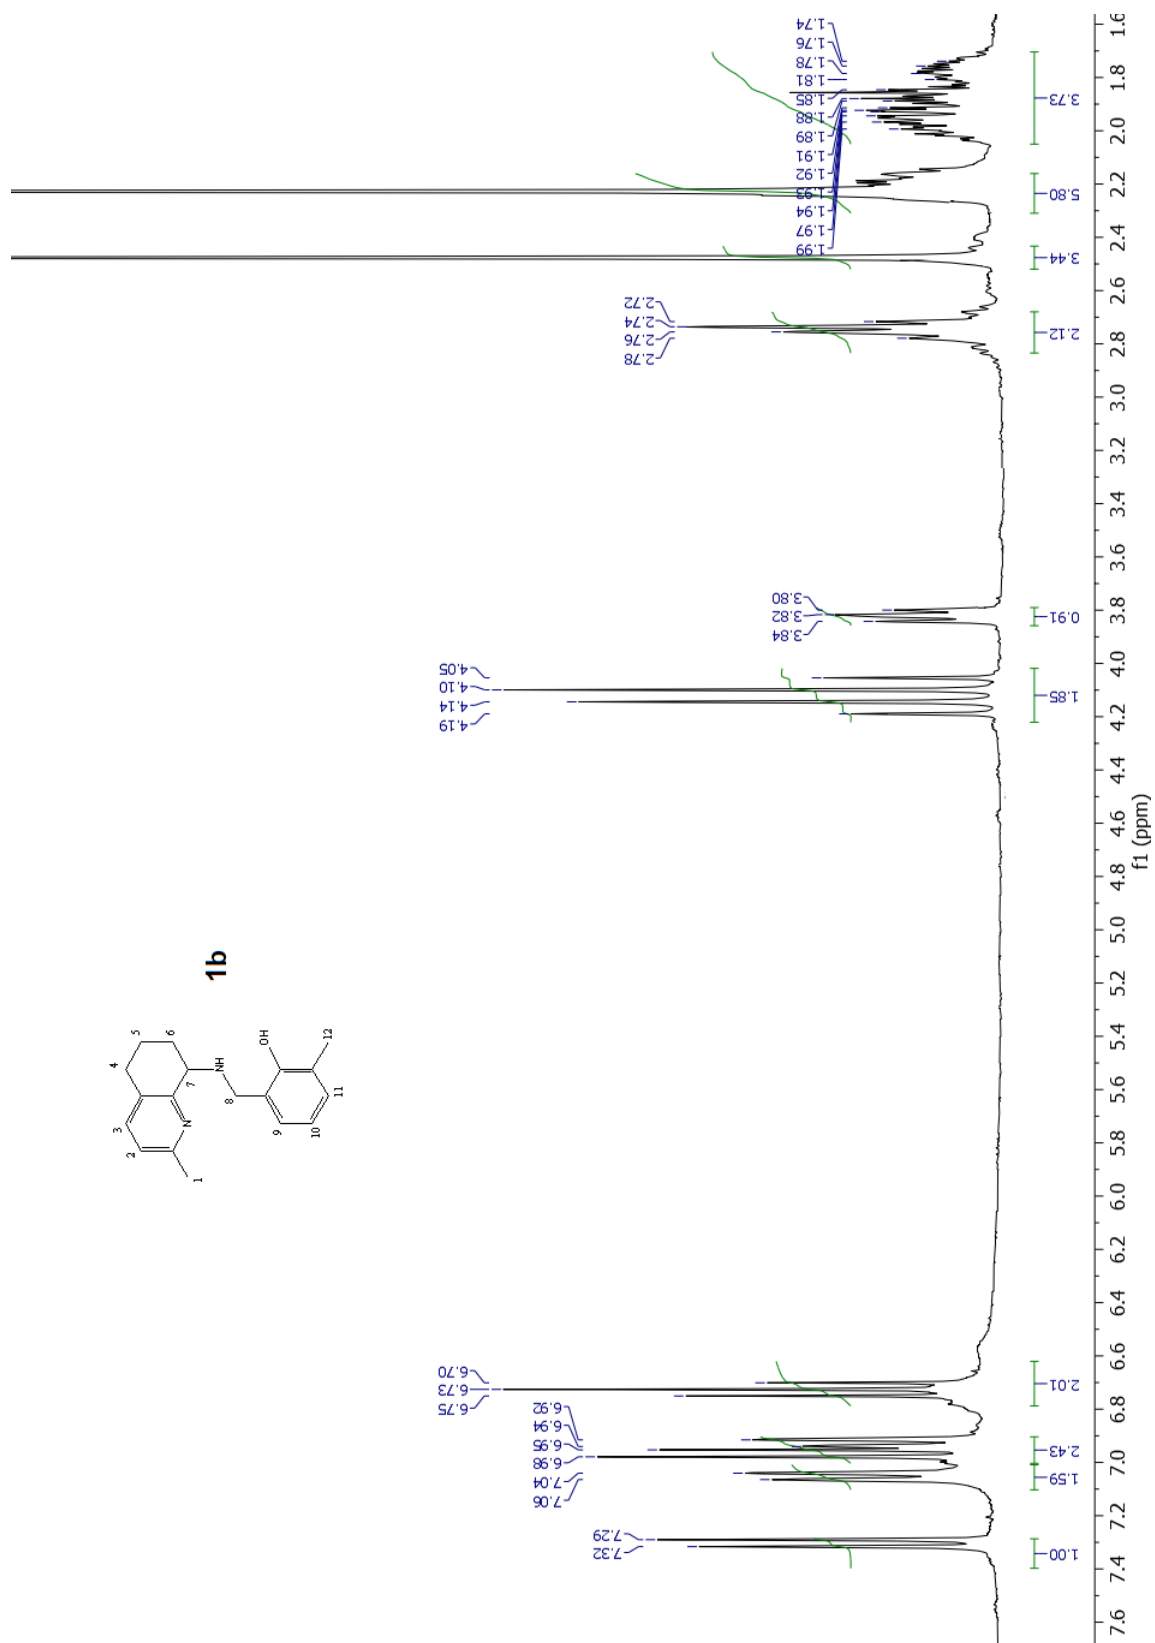



<sup>13</sup>C-NMR in CDCl<sub>3</sub> (75 MHz) of 2-methyl-6-(((2-methyl-5,6,7,8-tetrahydroquinolin-8-yl)amino)methyl)phenol **1b**

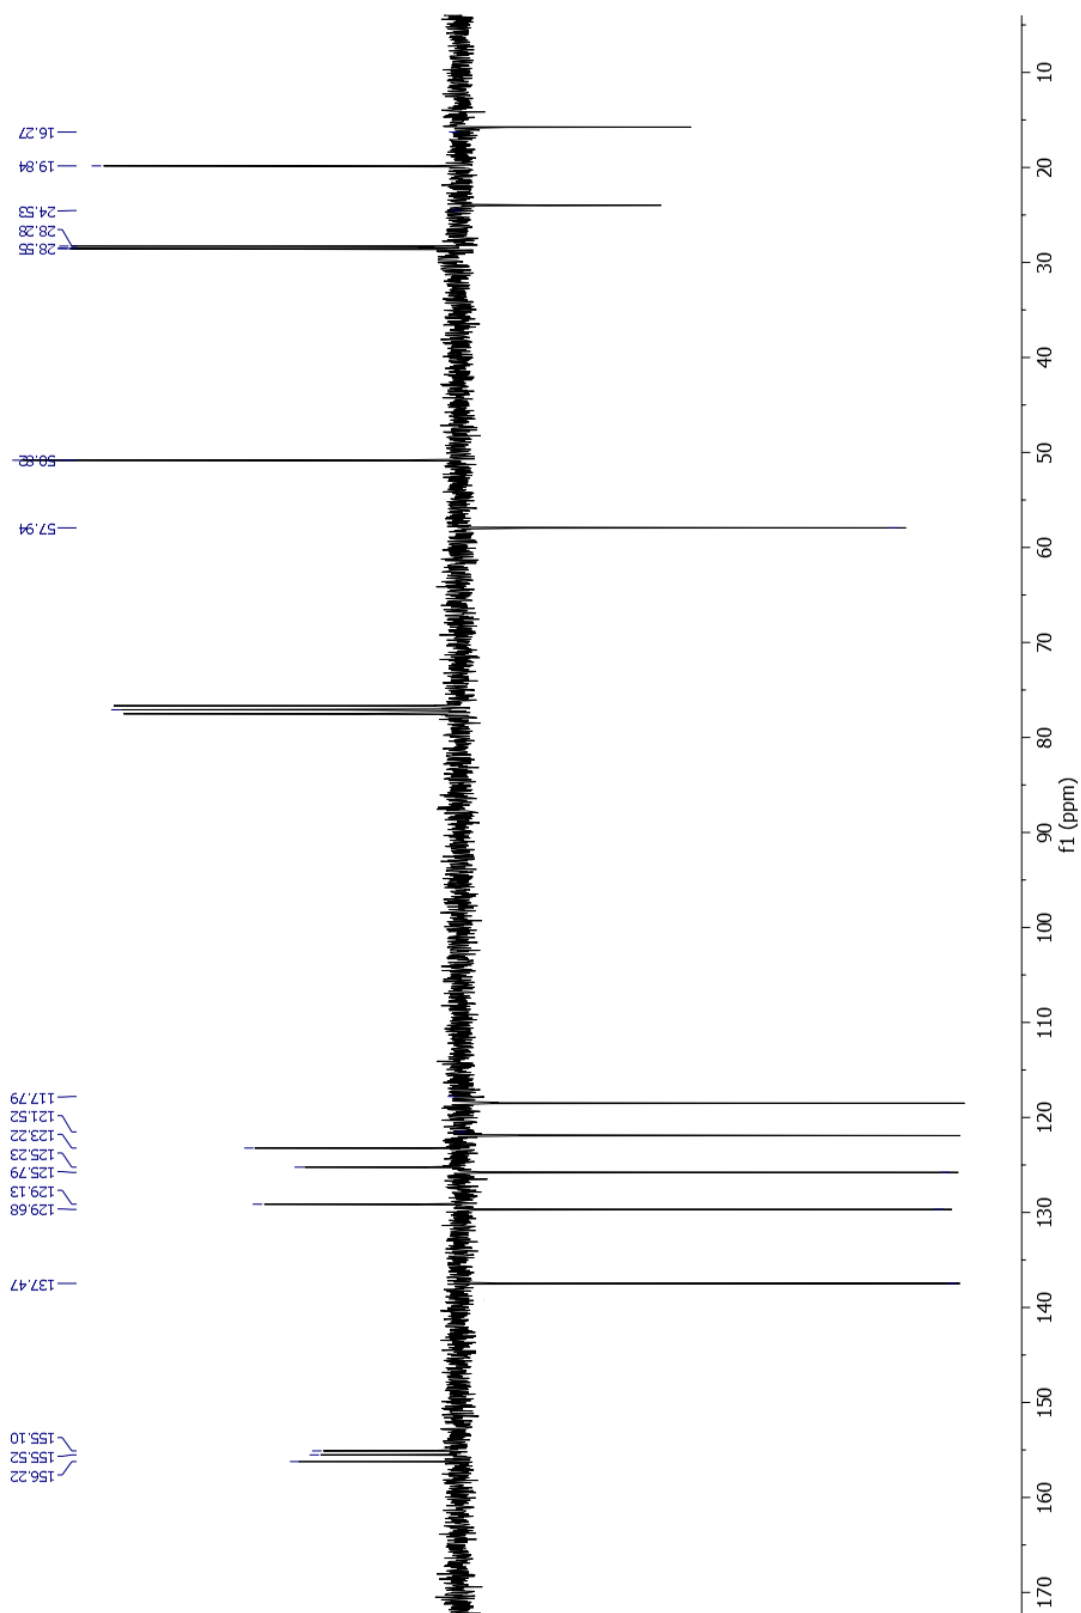

Log  $P$  of 2-methyl-6-(((2-methyl-5,6,7,8-tetrahydroquinolin-8-yl)amino)methyl)phenol **1b**

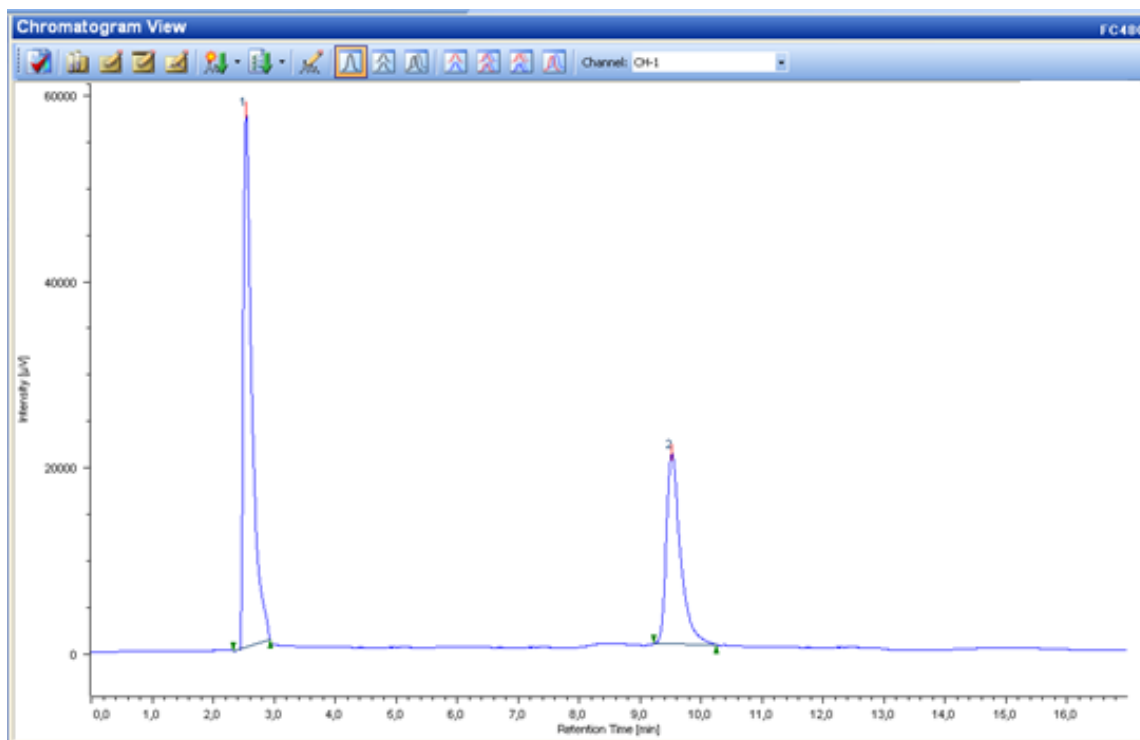

| Peak Name | CH | tR    | Area   | Height | Area%  | Height% | Quantity | NTP  | Resolution | Symmetry Factor |
|-----------|----|-------|--------|--------|--------|---------|----------|------|------------|-----------------|
| Unknown   | 1  | 2,485 | 862136 | 21365  | 46,536 | 44,285  | N/A      | 2458 | 3,125      | 2,025           |
| Unknown   | 1  | 9,603 | 882436 | 10563  | 53,464 | 23,220  | N/A      | 2156 | N/A        | 1,985           |

Log  $P_{o/w} = 3.96$

<sup>1</sup>H-NMR in CDCl<sub>3</sub> (300 MHz) of 4-methyl-2-(((2-methyl-5,6,7,8-tetrahydroquinolin-8-yl)amino)methyl)phenol **2b**

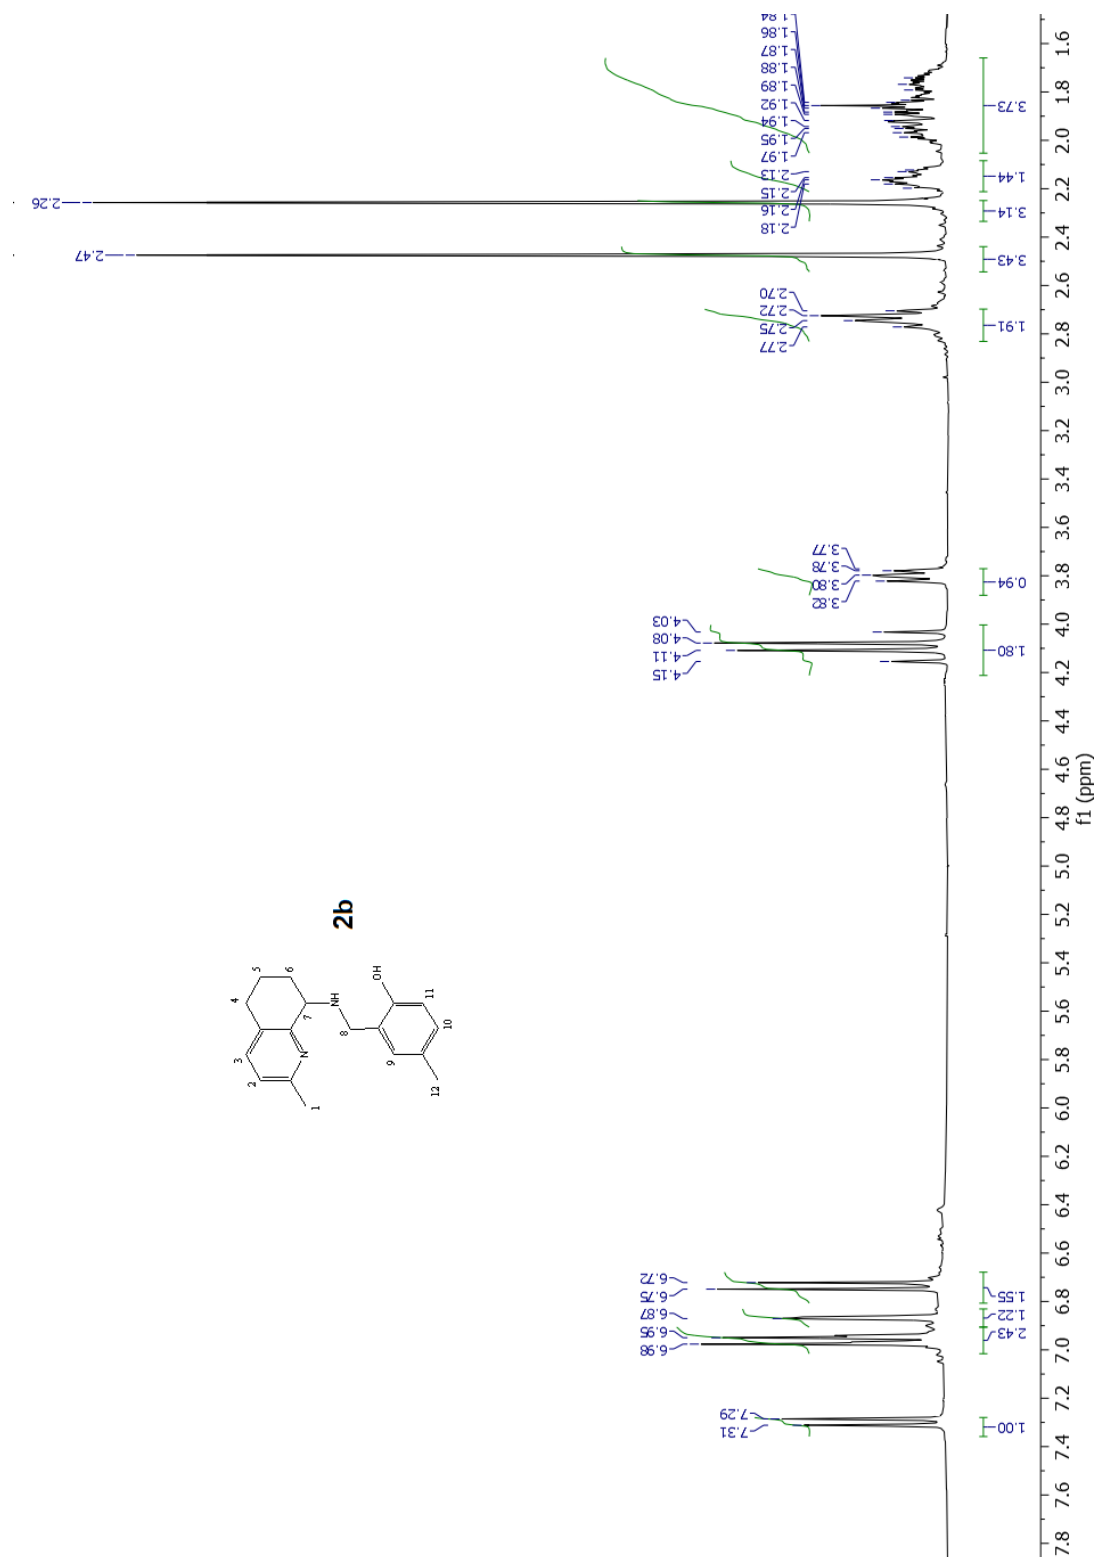

$^{13}\text{C}$ -NMR in  $\text{CDCl}_3$  (75 MHz) of 4-methyl-2-(((2-methyl-5,6,7,8-tetrahydroquinolin-8-yl)amino)methyl)phenol **2b**

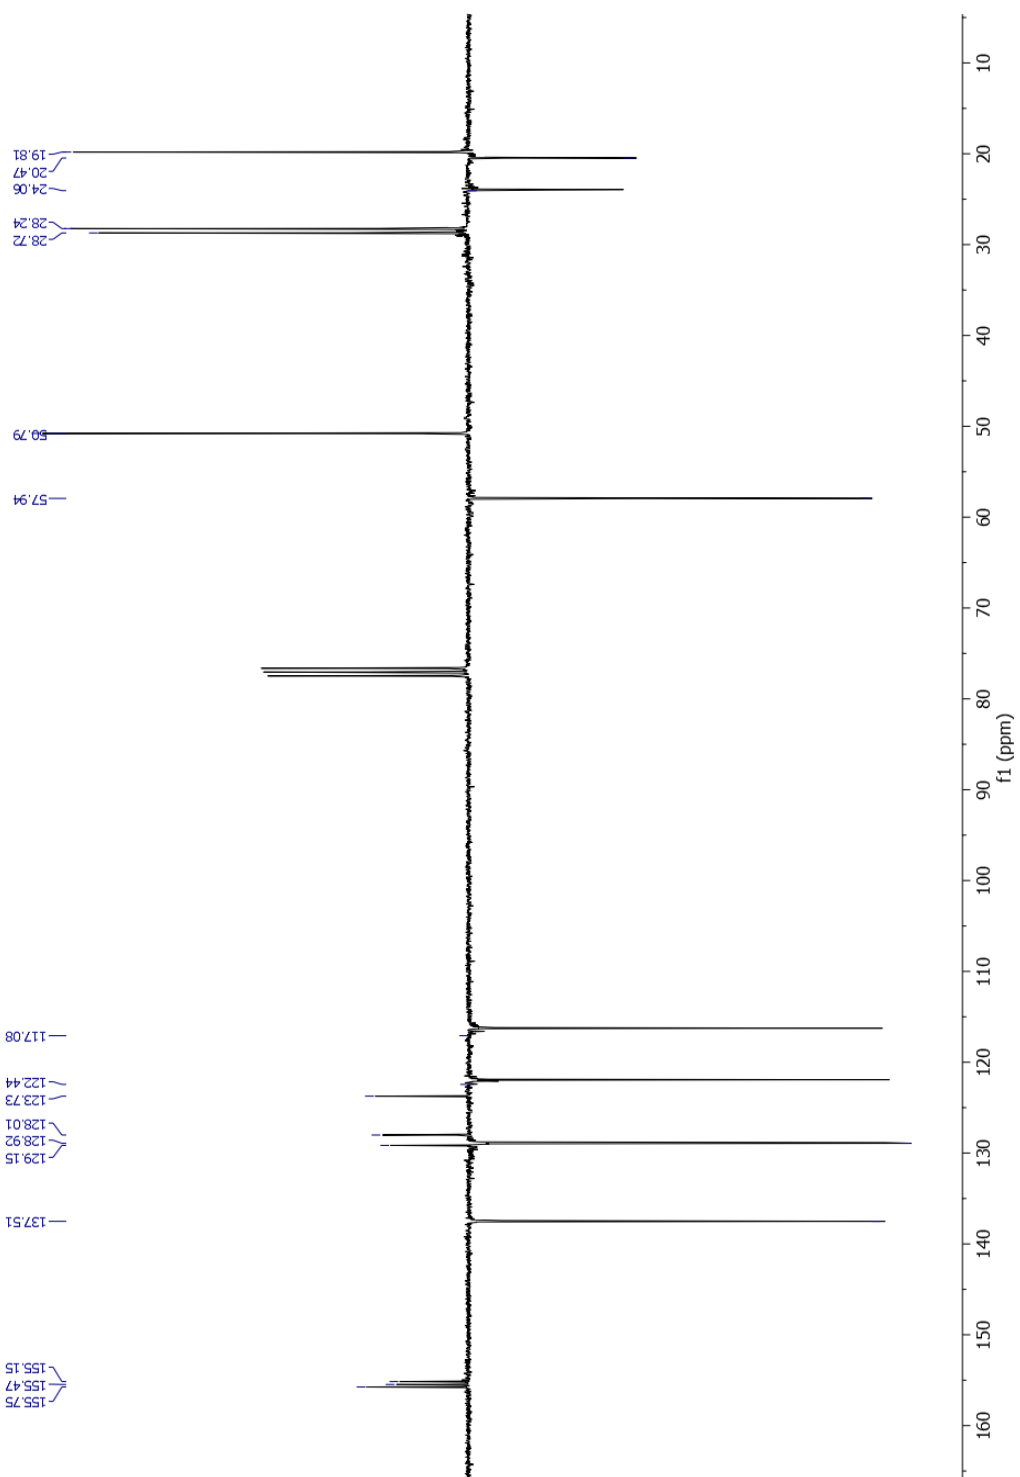

Log P of 4-methyl-2-(((2-methyl-5,6,7,8-tetrahydroquinolin-8-yl)amino)methyl)phenol **2b**

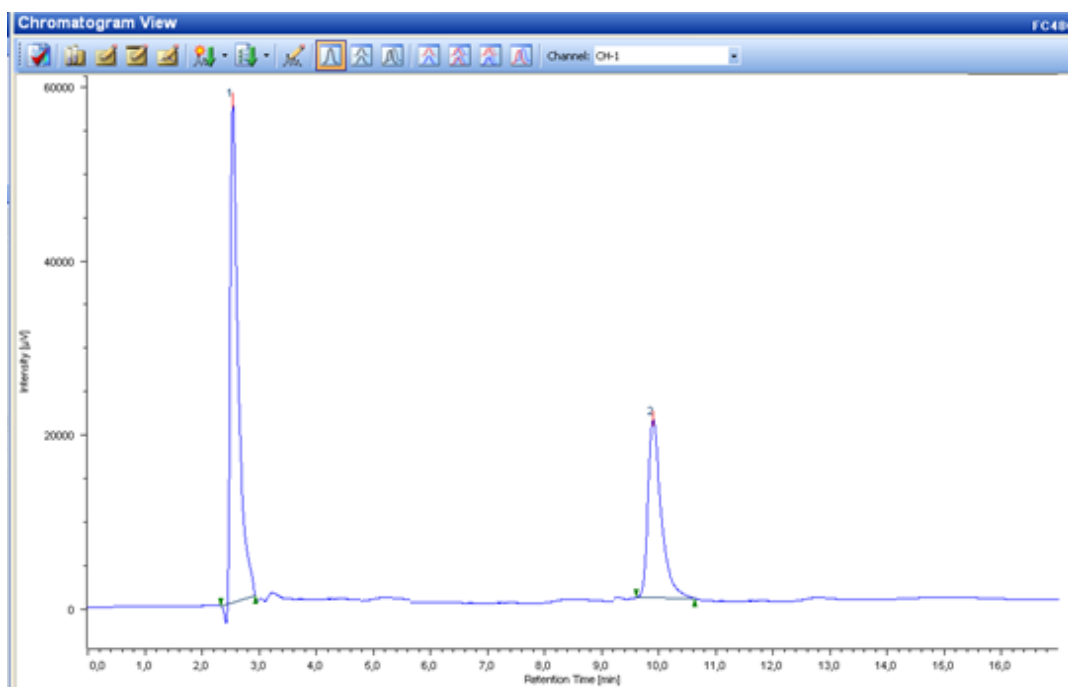

| Peak Name | CH | tR    | Area   | Height | Area%  | Height% | Quantity | NTP  | Resolution | Symmetry Factor |
|-----------|----|-------|--------|--------|--------|---------|----------|------|------------|-----------------|
| Unknown   | 1  | 2,538 | 552946 | 67412  | 47,139 | 63,135  | N/A      | 1763 | 6,716      | 2,207           |
| Unknown   | 1  | 9,987 | 610006 | 13044  | 52,861 | 34,865  | N/A      | 1608 | N/A        | 2,151           |

$\text{Log } P_{o/w} = 4.03$

<sup>1</sup>H-NMR in CDCl<sub>3</sub> (300 MHz) of 2-methyl-N-(pyridin-2-ylmethyl)-5,6,7,8-tetrahydroquinolin-8-amine

**3b**

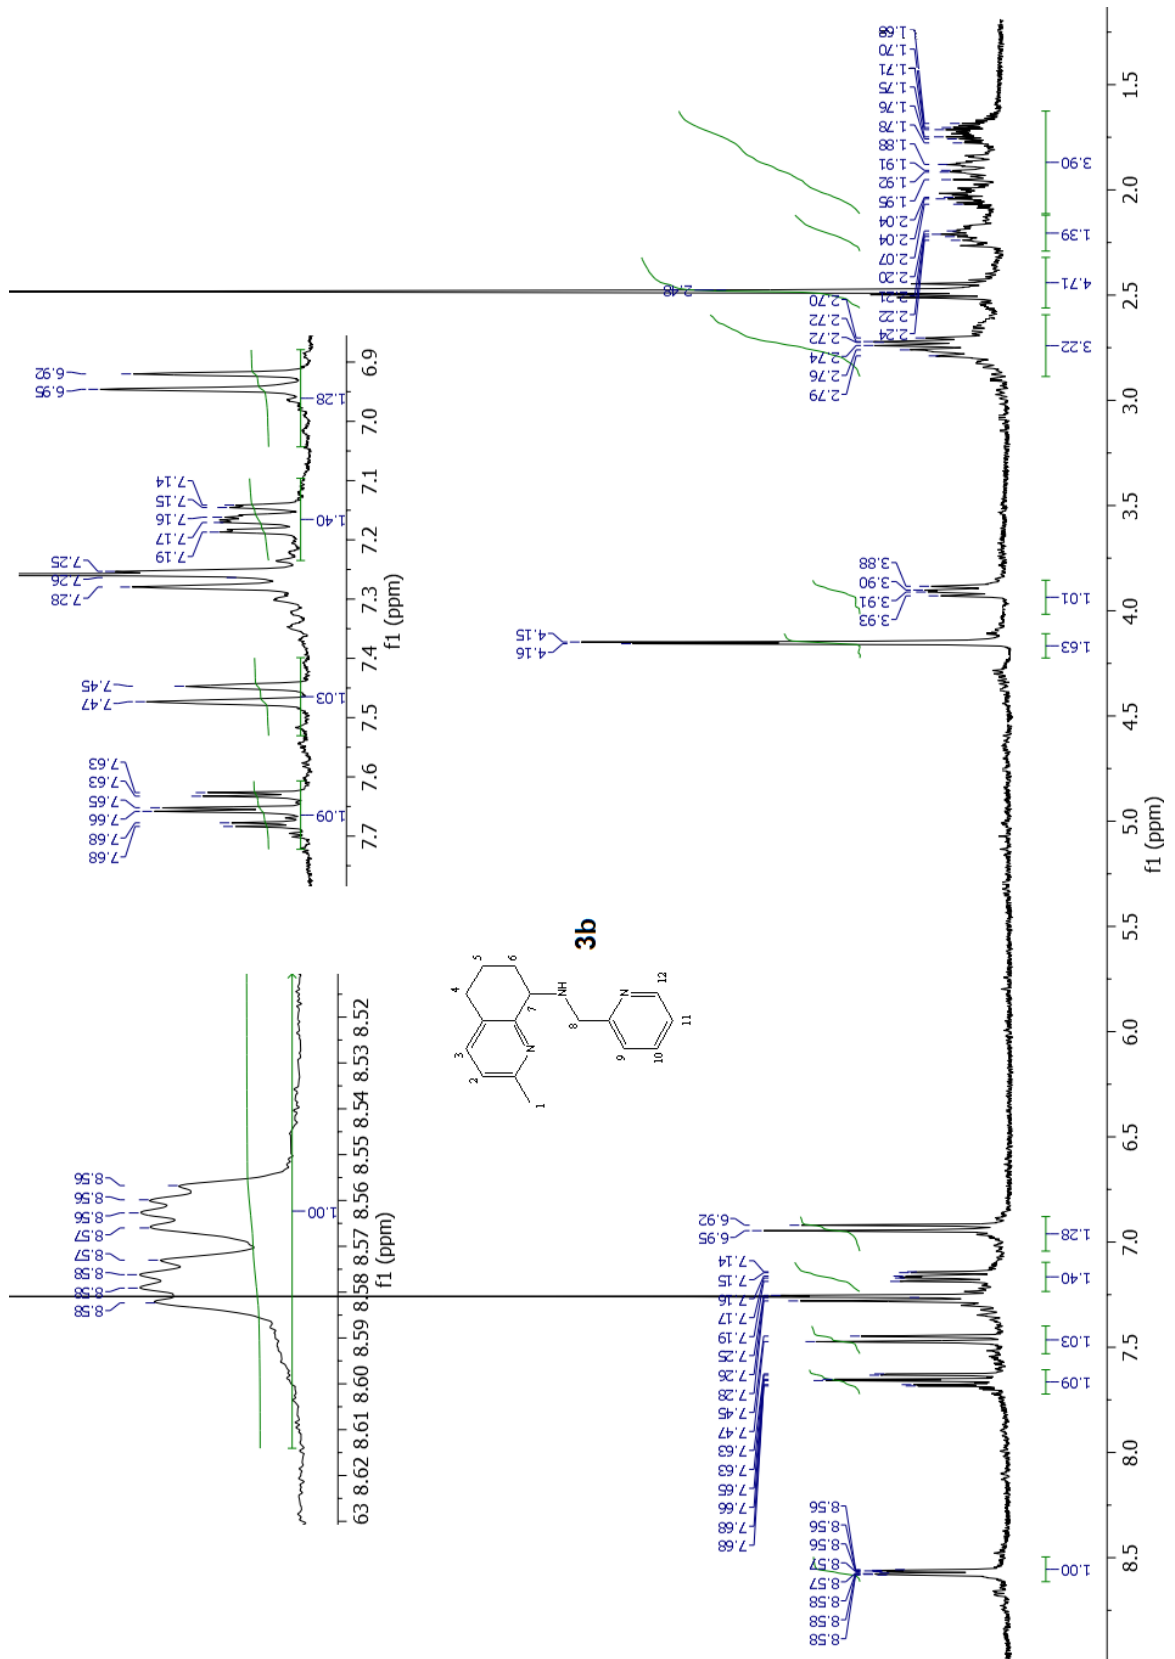

<sup>13</sup>C-NMR in CDCl<sub>3</sub> (75 MHz) of 2-methyl-N-(pyridin-2-ylmethyl)-5,6,7,8-tetrahydroquinolin-8-amine  
**3b**

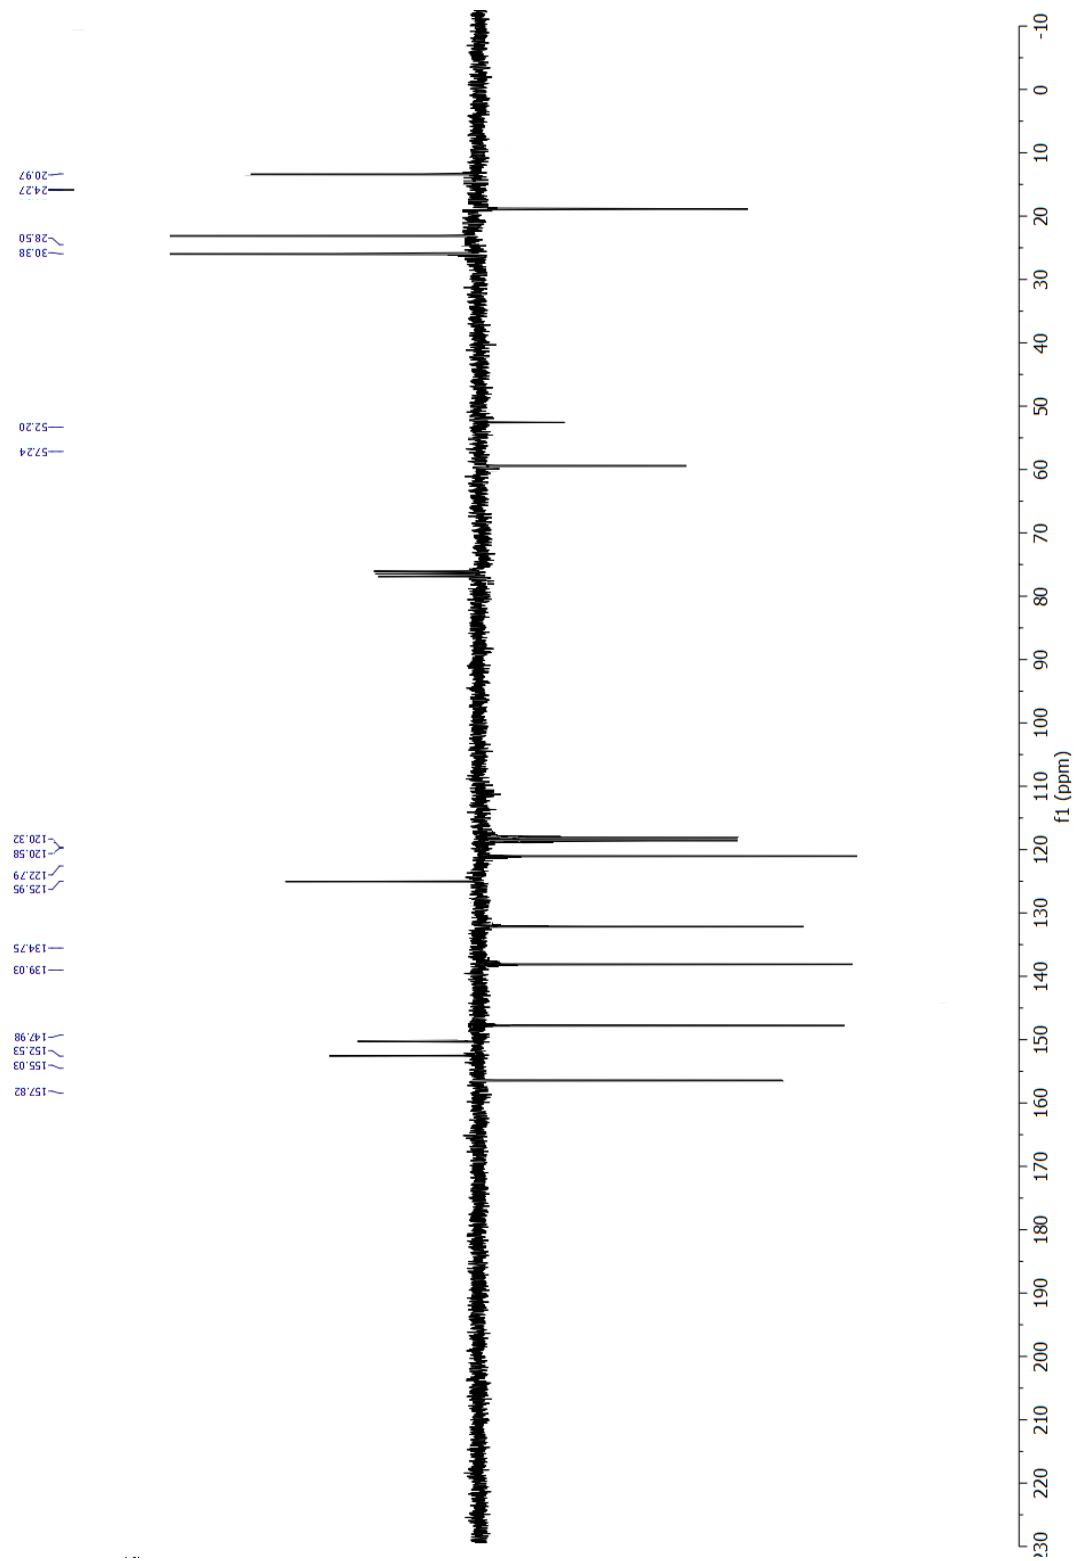

Log  $P$  of 2-methyl-N-(pyridin-2-ylmethyl)-5,6,7,8-tetrahydroquinolin-8-amine **3b**

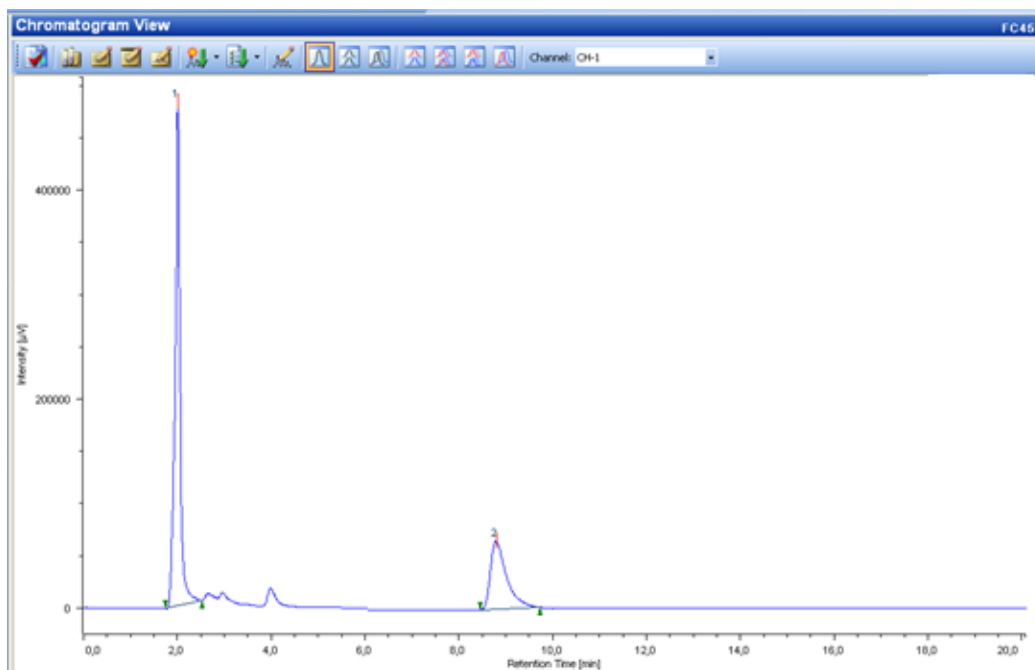

| Peak Name | CH | tR    | Area    | Height | Area%  | Height% | Quantity | NTP  | Resolution | Symmetry Factor |
|-----------|----|-------|---------|--------|--------|---------|----------|------|------------|-----------------|
| Unknown   | 1  | 2,008 | 3675874 | 401608 | 69,885 | 86,100  | N/A      | 2439 | 13,279     | 0,962           |
| Unknown   | 1  | 8,967 | 1540967 | 66016  | 30,115 | 11,892  | N/A      | 2291 | N/A        | 1,004           |

Log  $P_{o/w} = 4.12$



<sup>1</sup>H-NMR in CDCl<sub>3</sub> (300 MHz) of 2-methyl-N-((1-methyl-1H-imidazol-4-yl)methyl)-5,6,7,8-tetrahydroquinolin-8-amine **4b**

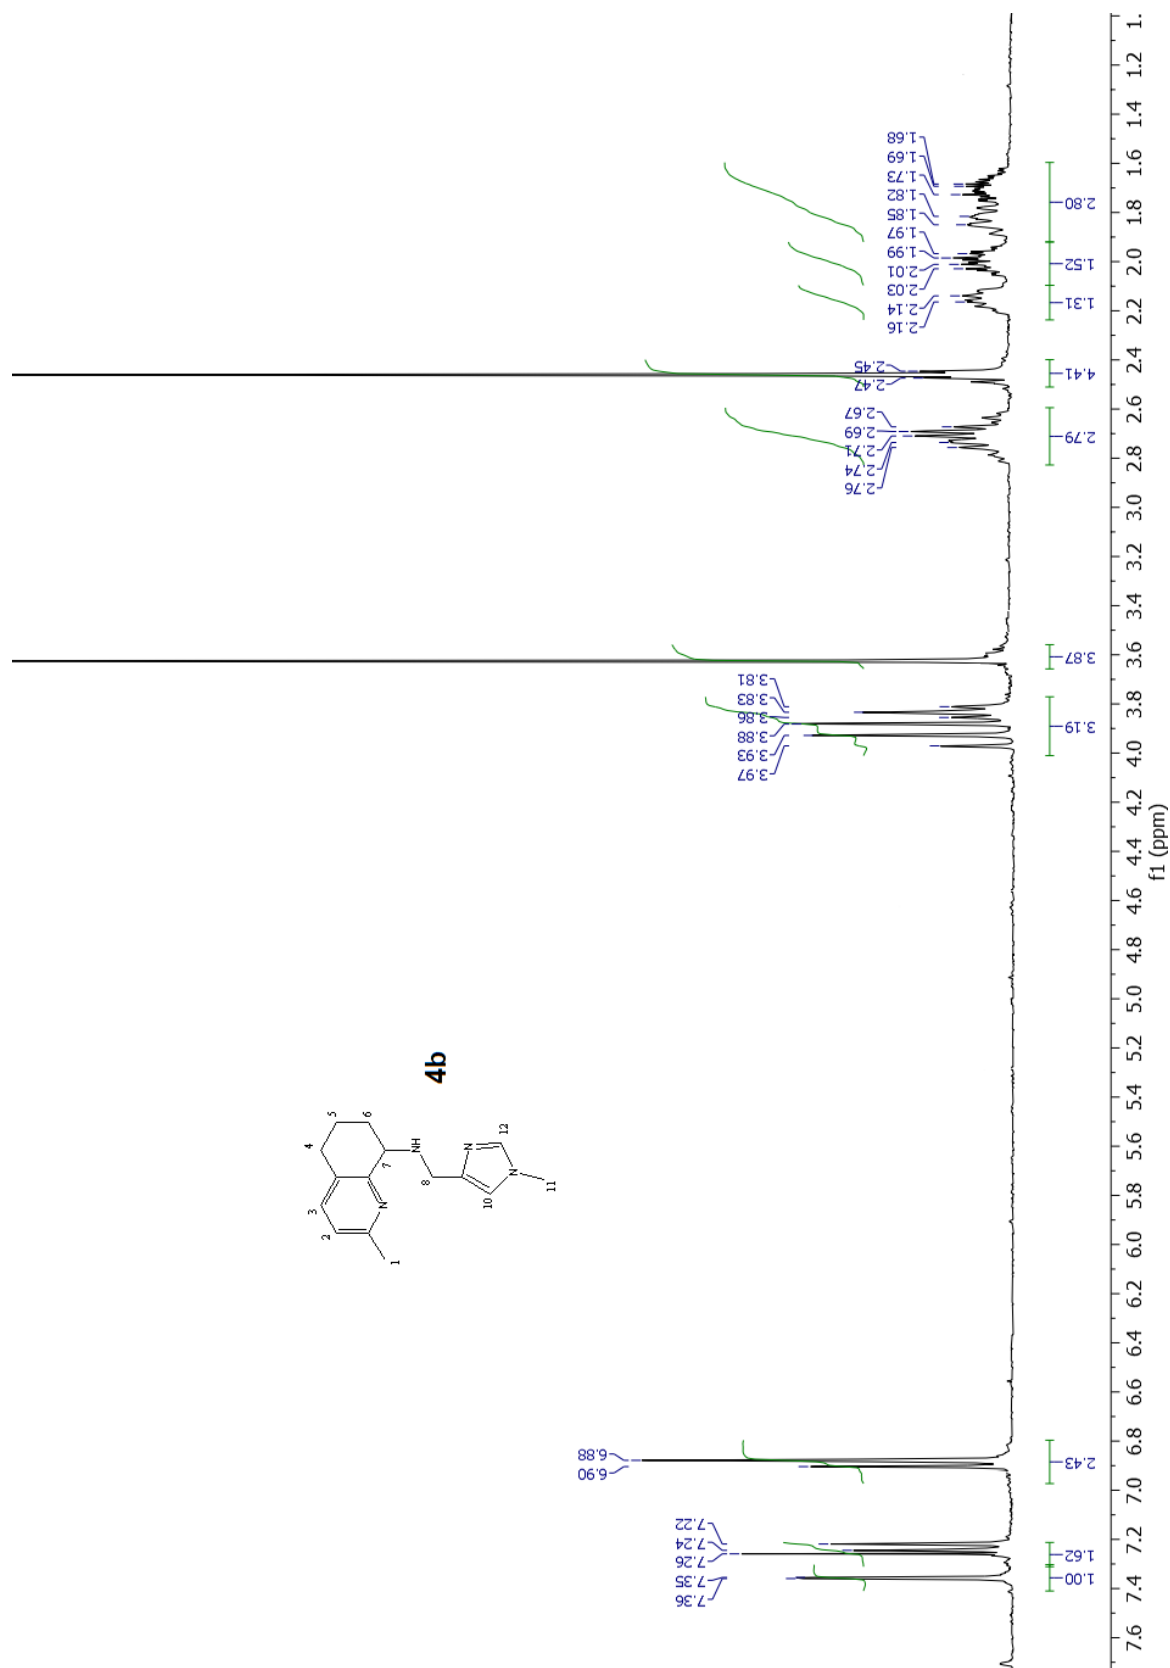

$^{13}\text{C}$ -NMR in  $\text{CDCl}_3$  (75 MHz) of 2-methyl-N-((1-methyl-1H-imidazol-4-yl)methyl)-5,6,7,8-tetrahydroquinolin-8-amine **4b**

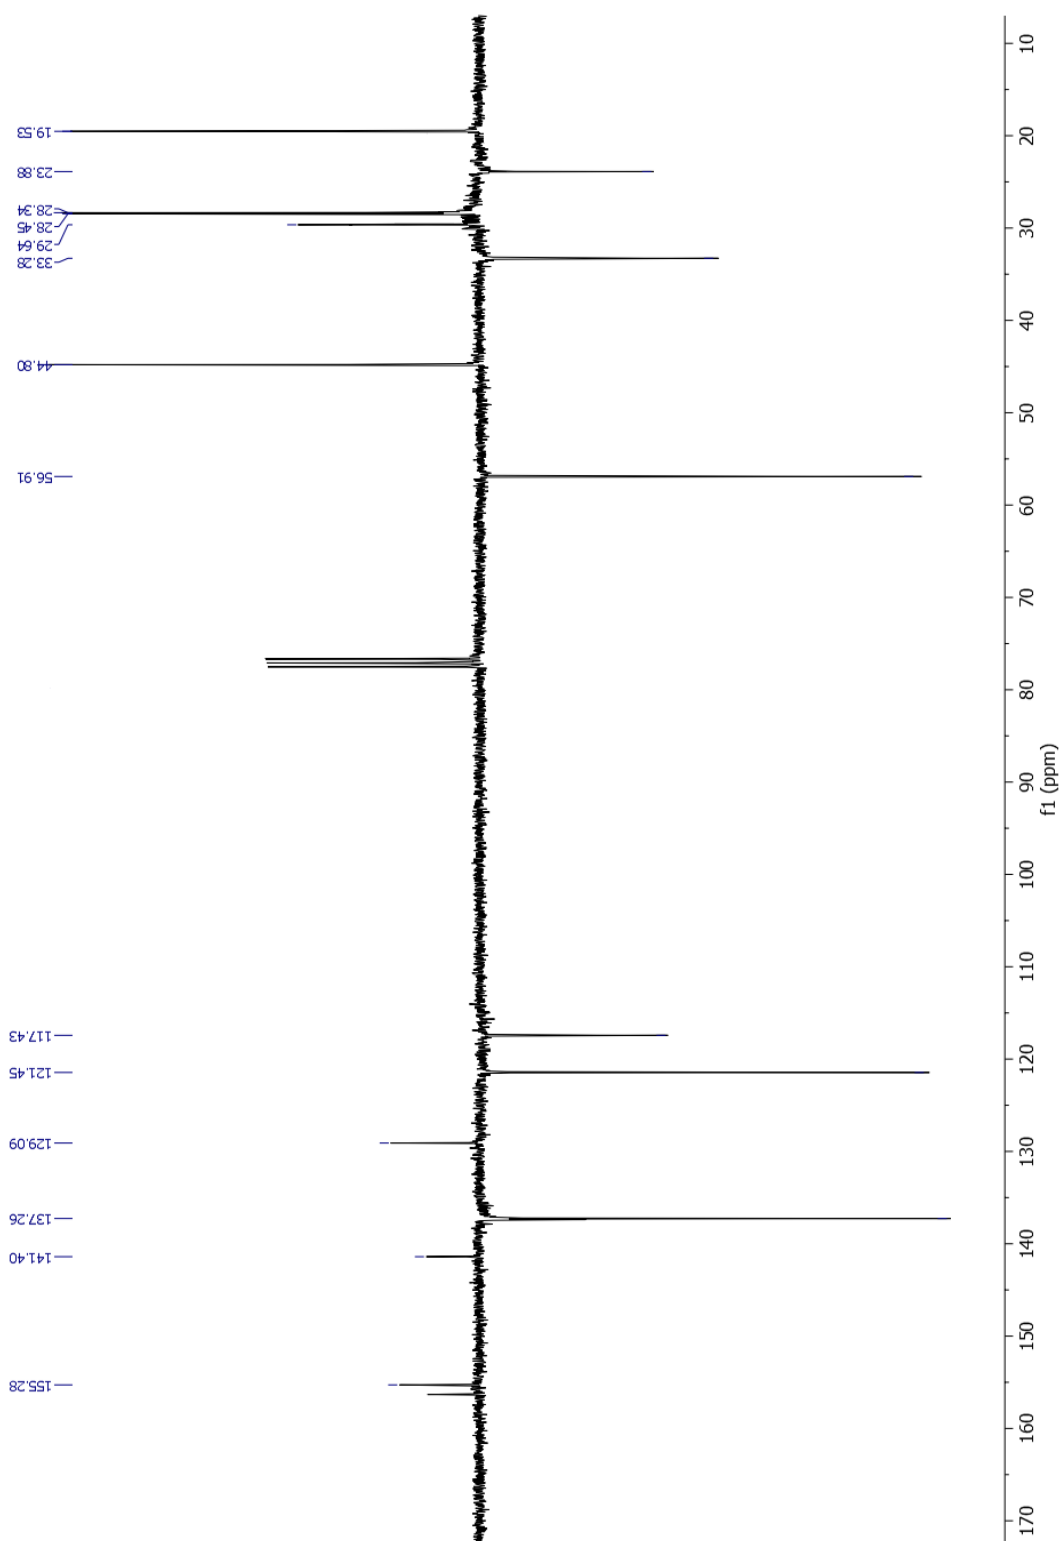

Log  $P$  of 2-methyl-N-((1-methyl-1H-imidazol-4-yl)methyl)-5,6,7,8-tetrahydroquinolin-8-amine **4b**

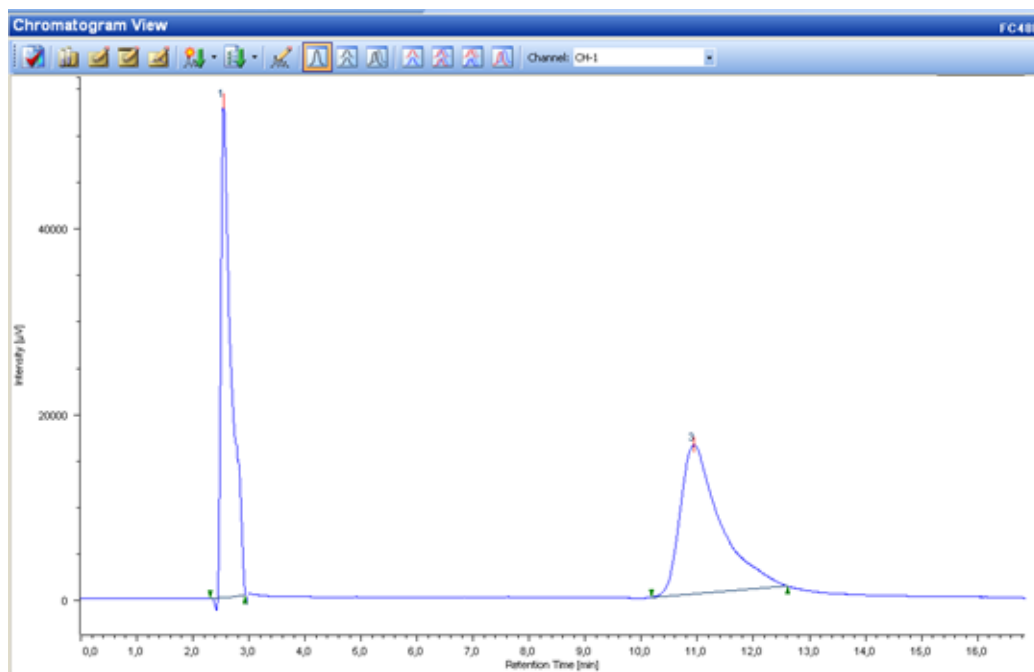

| Peak Name | CH | tR     | Area   | Height | Area%  | Height% | Quantity | NTP  | Resolution | Symmetry Factor |
|-----------|----|--------|--------|--------|--------|---------|----------|------|------------|-----------------|
| Unknown   | 1  | 2,542  | 797608 | 63240  | 50,490 | 66,797  | N/A      | 1160 | 4,443      | 3,516           |
| Unknown   | 1  | 10,933 | 794327 | 15976  | 49,510 | 20,043  | N/A      | 1135 | N/A        | 1,871           |

Log  $P_{o/w} = 4.11$

<sup>1</sup>H-NMR in CDCl<sub>3</sub> (300 MHz) of N-((1H-imidazol-2-yl)methyl)-2-methyl-5,6,7,8-tetrahydroquinolin-8-amine **5b**

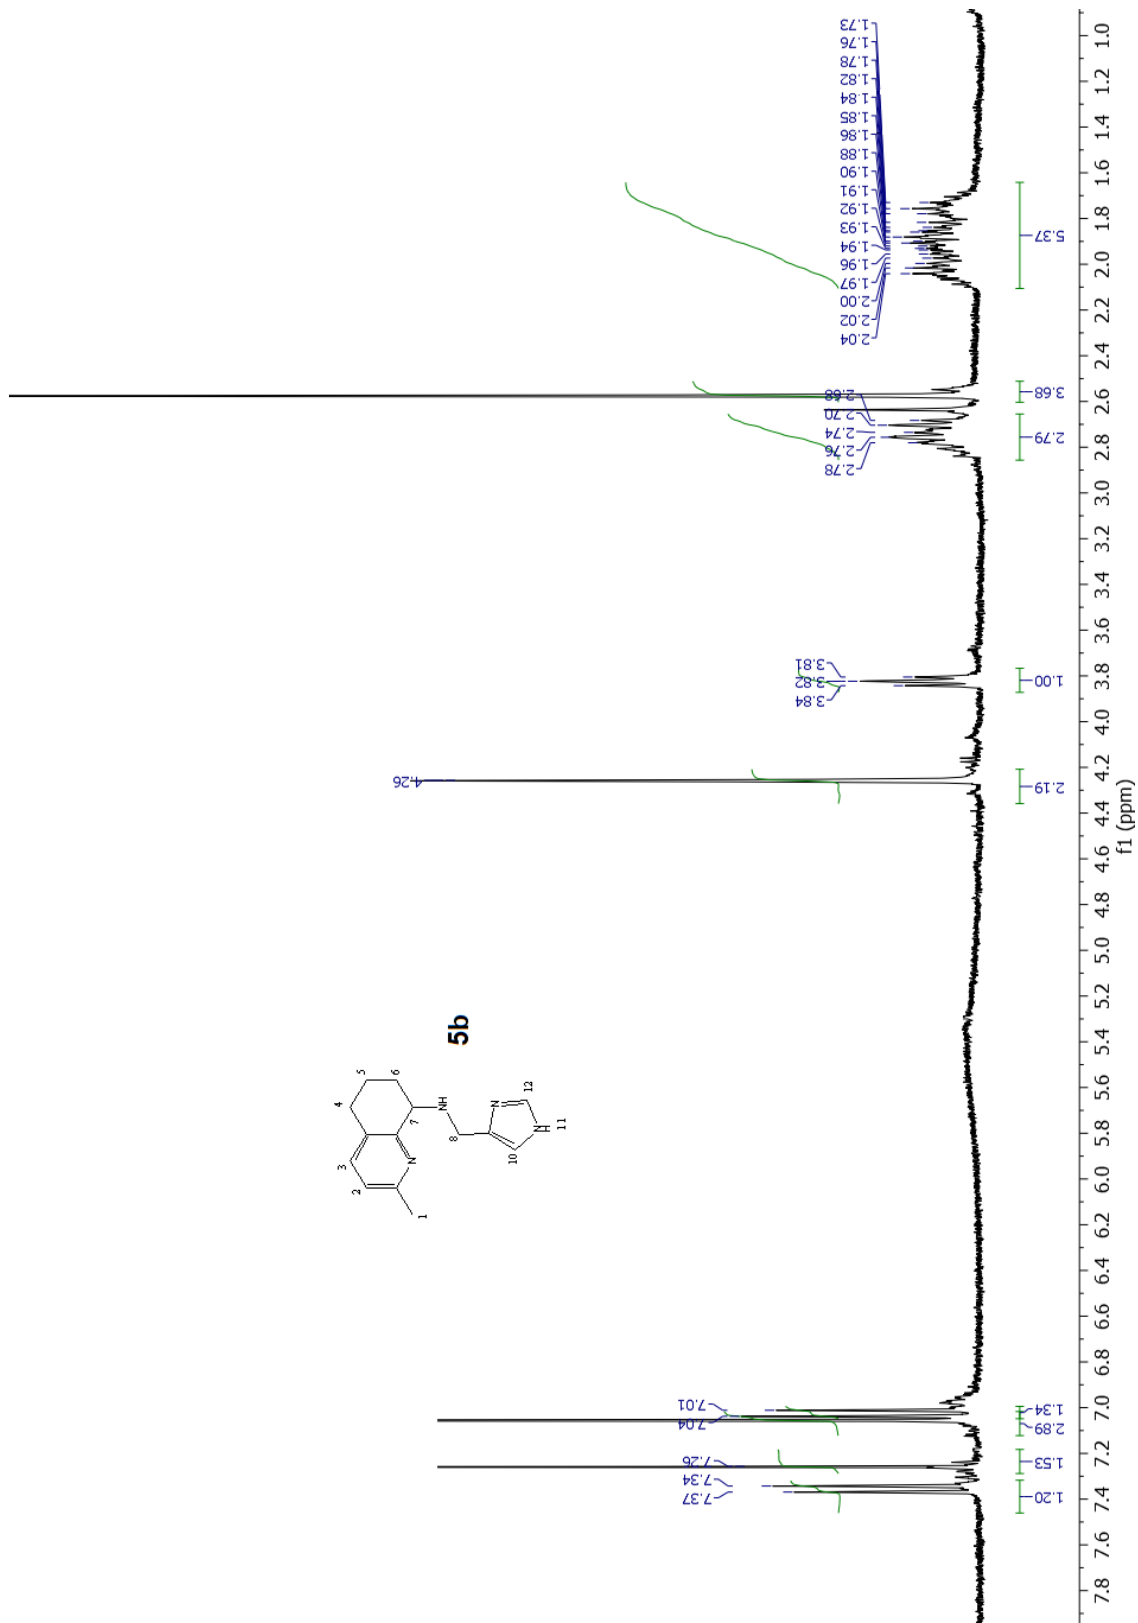

$^{13}\text{C}$ -NMR in  $\text{CDCl}_3$  (75 MHz) of N-((1H-imidazol-2-yl)methyl)-2-methyl-5,6,7,8-tetrahydroquinolin-8-amine **5b**

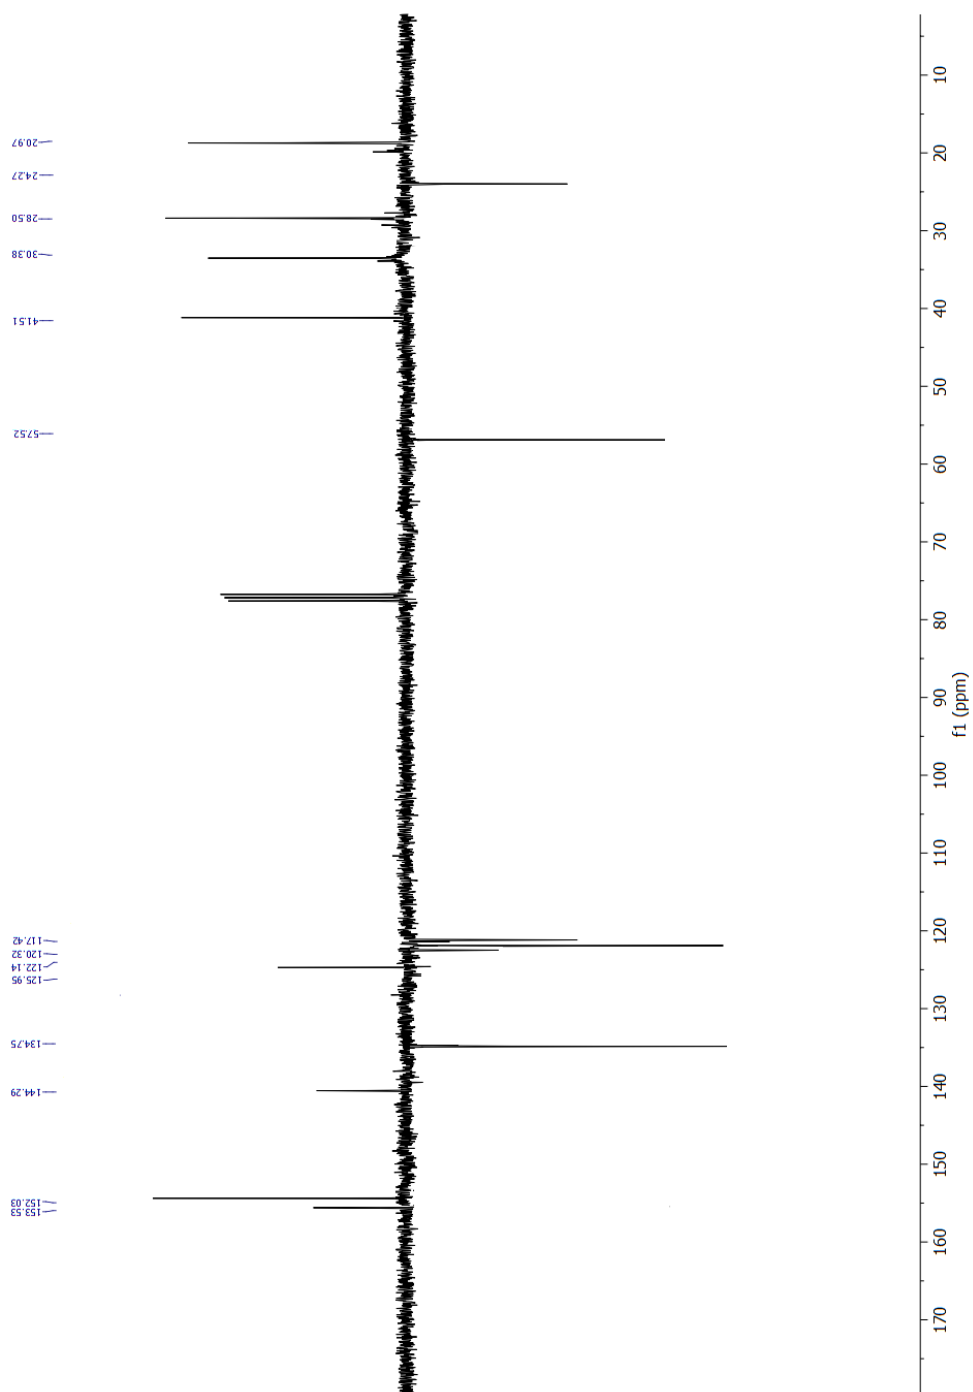

Log *P* of N-((1H-imidazol-2-yl)methyl)-2-methyl-5,6,7,8-tetrahydroquinolin-8-amine **5b**

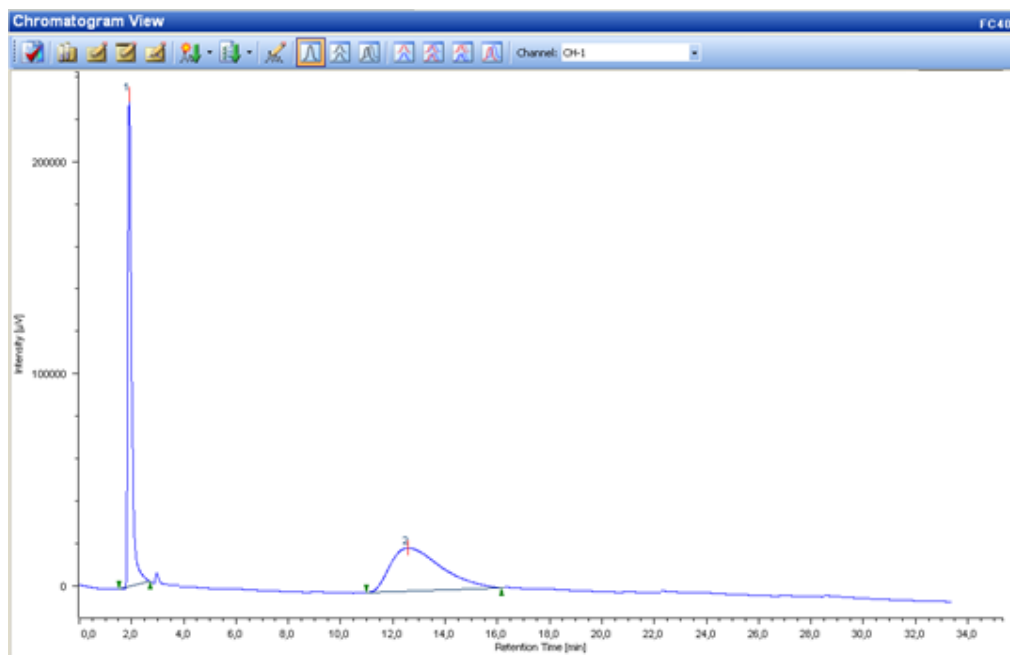

| Peak Name | CH | tR     | Area     | Height  | Area%  | Height% | Quantity | NTP | Resolution | Symmetry Factor |
|-----------|----|--------|----------|---------|--------|---------|----------|-----|------------|-----------------|
| Unknown   | 1  | 1,908  | 23986026 | 2312227 | 25,406 | 66,239  | N/A      | 949 | 8,464      | 1,022           |
| Unknown   | 1  | 12,358 | 49218765 | 16640   | 74,594 | 8,169   | N/A      | 221 | N/A        | 1,891           |

Log  $P_{o/w} = 4.35$

<sup>1</sup>H-NMR in CDCl<sub>3</sub> (300 MHz) of 9-(((2-methyl-5,6,7,8-tetrahydroquinolin-8-yl)amino)methyl)-2,3,6,7-tetrahydro-1H,5H-pyrido[3,2,1-ij]quinolin-8-ol **6b**

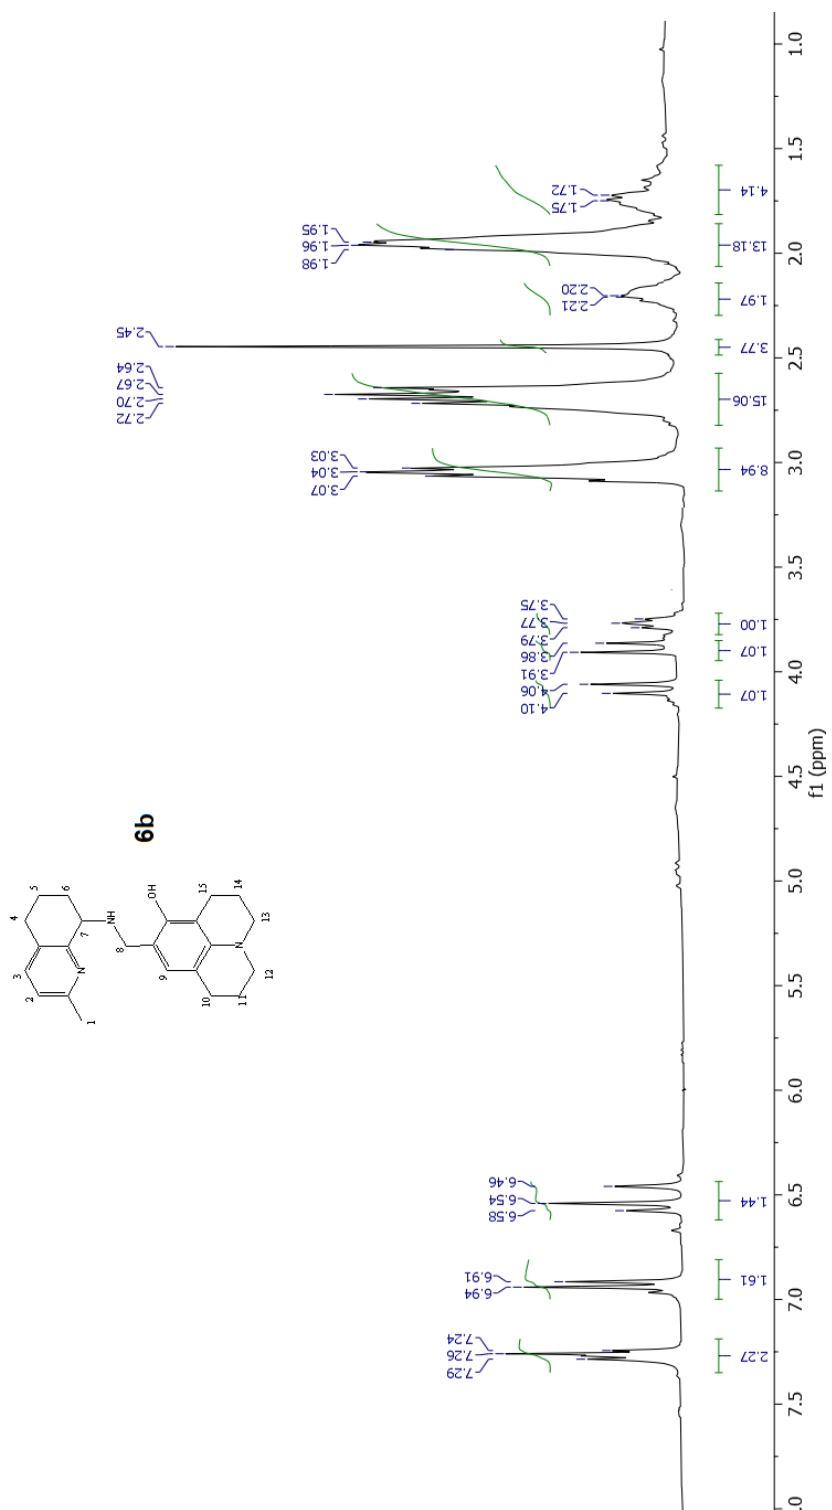

<sup>13</sup>C-NMR in CDCl<sub>3</sub> (75 MHz) of 9-(((2-methyl-5,6,7,8-tetrahydroquinolin-8-yl)amino)methyl)-2,3,6,7-tetrahydro-1H,5H-pyrido[3,2,1-ij]quinolin-8-ol **6b**

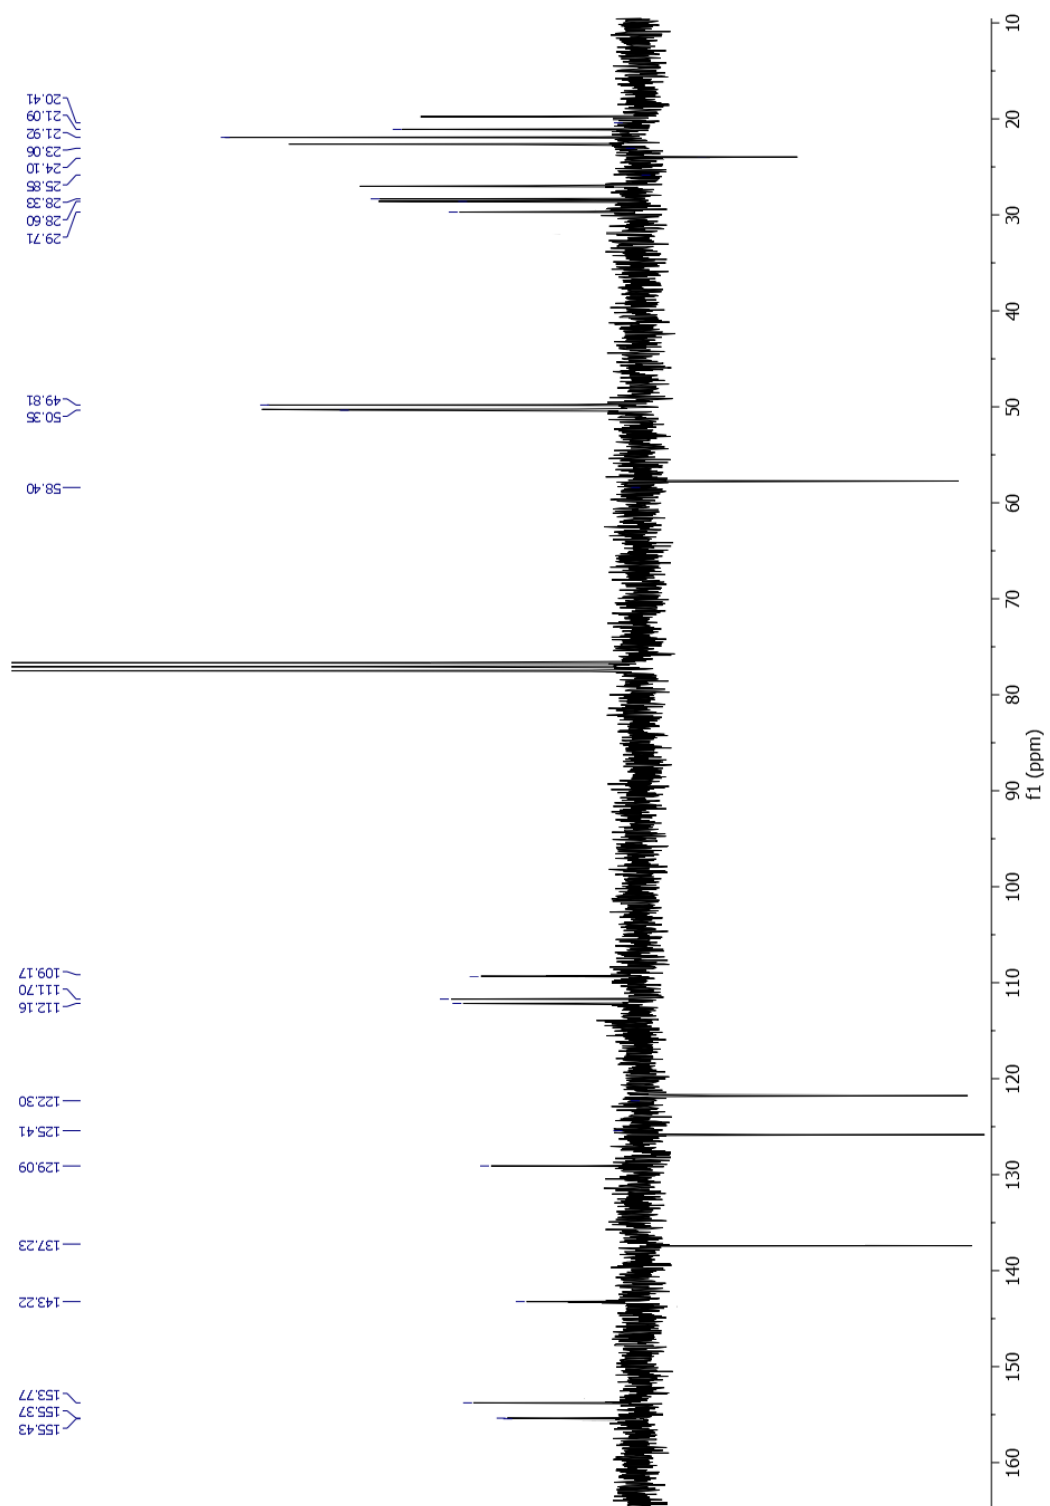



Log  $P$  of 9-(((2-methyl-5,6,7,8-tetrahydroquinolin-8-yl)amino)methyl)-2,3,6,7-tetrahydro-1H,5H-pyrido[3,2,1-ij]quinolin-8-ol **6b**

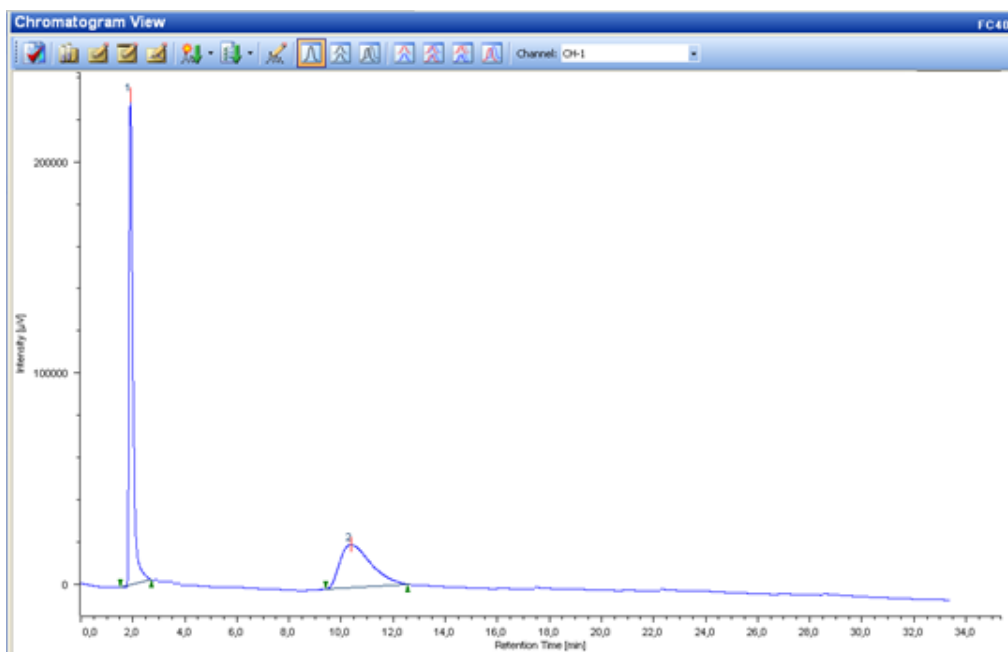

| Peak Name | CH | tR     | Area   | Height | Area%  | Height% | Quantity | NTP | Resolution | Symmetry Factor |
|-----------|----|--------|--------|--------|--------|---------|----------|-----|------------|-----------------|
| Unknown   | 1  | 1,906  | 439682 | 23122  | 37,486 | 65,239  | N/A      | 949 | 8,456      | 1,022           |
| Unknown   | 1  | 10,467 | 573762 | 20266  | 62,514 | 27,692  | N/A      | 423 | 1,130      | 1,601           |

Log  $P_{o/w} = 4.13$
